# Supplementary material
Source: publisher figshare collection journal article supplement (https://acs.figshare.com/ndownloader/files/17859947)
Supplement: Supplementary file 1 [file 17859947]

## Supporting Information

### 1-Methyl-1,4-cyclohexadiene as a traceless reducing agent for the synthesis of catechols and hydroquinones

Andrea Baschieri,<sup>\*, a</sup> Riccardo Amorati,<sup>\*, a</sup> Luca Valgimigli<sup>a</sup> and Letizia Sambri<sup>b</sup>

<sup>a</sup> Dipartimento di Chimica “Giacomo Ciamician”, Università di Bologna, Via S. Giacomo 11, 40126 Bologna, Italy. E-mail: [andrea.baschieri2@unibo.it](mailto:andrea.baschieri2@unibo.it) (A.B.); [riccardo.amorati@unibo.it](mailto:riccardo.amorati@unibo.it) (R.A.)

<sup>b</sup> Dipartimento di Chimica Industriale “Toso Montanari”, Università di Bologna, Viale Risorgimento 4, 40136 Bologna, Italy.

#### Index

|                                                                                                                                                    |         |
|----------------------------------------------------------------------------------------------------------------------------------------------------|---------|
| Representative results of the screening of solvents. (Table S1)                                                                                    | Page 2  |
| Representative results of the screening of MeCHD equivalents. (Table S2)                                                                           | Page 2  |
| MeCHD conversion to toluene in absence or presence of quinone <b>1a</b> (Table S3)                                                                 | Page 3  |
| Conversion of <i>para</i> -quinone <b>3a</b> in the presence of <i>ortho</i> -quinone <b>1a</b> (Table S4)                                         | Page 3  |
| Oxygen effect on the reduction reaction of <b>1a</b> and <b>3a</b> (Table S5)                                                                      | Page 3  |
| MeCHD conversion to toluene in absence of quinone <b>1a</b> . (Figure S1)                                                                          | Page 4  |
| MeCHD conversion to toluene in presence of quinone <b>1a</b> . (Figure S2)                                                                         | Page 5  |
| Conversion of compound <b>1a</b> to catechol <b>2a</b> in a NMR tube after 24 h. (Figure S3)                                                       | Page 6  |
| Conversion of compound <b>3a</b> (6.46 ppm) to hydroquinone <b>4a</b> (6.57 ppm) in the presence of 10% of <b>1a</b> (6.86 – 6.75ppm). (Figure S4) | Page 7  |
| Conversion of compound <b>3a</b> (6.48 ppm) to hydroquinone <b>4a</b> (6.58 ppm) in the presence of 50% of <b>1a</b> (6.88 – 6.75ppm). (Figure S5) | Page 7  |
| Results from theoretical calculations (cartesian coordinates and computed energies)                                                                | Page 8  |
| NMR spectra of compounds <b>2a-f</b> , <b>4a-l</b> and <b>4CoQ<sub>0</sub></b> (Figure S6-S28)                                                     | Page 25 |

Table S1: Representative results of the screening of solvents.<sup>[a]</sup>

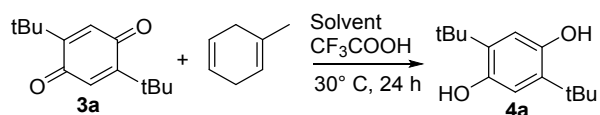

| Entry | Solvent            | <b>4a</b> Conv. <sup>[b]</sup> [%] |
|-------|--------------------|------------------------------------|
| 1     | Tetrahydrofuran    | 0                                  |
| 2     | Acetonitrile       | 5                                  |
| 3     | Dichloromethane    | 98                                 |
| 4     | Methanol           | 1                                  |
| 5     | Dimethyl sulfoxide | 0                                  |
| 6     | Hexane             | 92                                 |
| 7     | Cyclohexane        | 94                                 |
| 8     | Toluene            | >99                                |

<sup>[a]</sup>Reaction conditions: **1a** (0.09 mmol), 1-methyl-1,4-cyclohexadiene (3.6 mmol), trifluoroacetic acid (3.6 mmol), solvent (1.0 mL), 30 °C, 24 h. <sup>[b]</sup>Conversion was determined by <sup>1</sup>H NMR spectroscopy.

Table S2: Representative results of the screening of MeCHD equivalents on product conversion.<sup>[a]</sup>

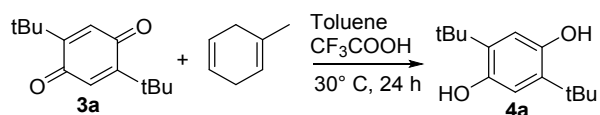

| Entry | MeCHD (equiv) | <b>4a</b> Conv. <sup>[b]</sup> [%] |
|-------|---------------|------------------------------------|
| 1     | 0             | 0                                  |
| 2     | 2             | 20                                 |
| 3     | 5             | 40                                 |
| 4     | 10            | 52                                 |
| 5     | 20            | 85                                 |
| 6     | 30            | >99                                |
| 7     | 40            | >99                                |

<sup>[a]</sup>Reaction conditions: **1a** (0.09 mmol), trifluoroacetic acid (3.6 mmol), solvent (1.0 mL), 30 °C, 24 h. <sup>[b]</sup>Conversion was determined by <sup>1</sup>H NMR spectroscopy.

Table S3: MeCHD conversion to toluene in absence or presence of quinone **1a**.<sup>[a]</sup>

| Entry | Time (h) | <b>1a</b> | <b>2a</b> Conv. <sup>[b]</sup> [%] | Toluene:MeCHD <sup>[c]</sup> [%] |
|-------|----------|-----------|------------------------------------|----------------------------------|
| 1     | 0        | no        | /                                  | 2.47                             |
| 2     | 1        | no        | /                                  | 2.29                             |
| 3     | 2.5      | no        | /                                  | 2.50                             |
| 4     | 5.5      | no        | /                                  | 2.64                             |
| 5     | 7        | no        | /                                  | 2.81                             |
| 6     | 24       | no        | /                                  | 3.03                             |
| 7     | 0        | yes       | 0                                  | 2.83                             |
| 8     | 1        | yes       | 42                                 | 4.33                             |
| 9     | 2.5      | yes       | 78                                 | 5.42                             |
| 10    | 5.5      | yes       | 100                                | 6.03                             |
| 11    | 7        | yes       | 100                                | 5.65                             |
| 12    | 24       | yes       | 100                                | 6.53                             |

<sup>[a]</sup>Reaction conditions: Experiment performed in a NMR tube: **1a** (0.045 mmol), CD<sub>2</sub>Cl<sub>2</sub> (0.75 mL), MeCHD (1.35 mmol), 30 °C. <sup>[b]</sup>Conversion was determined by <sup>1</sup>H NMR spectroscopy, <sup>[c]</sup><sup>1</sup>H NMR signal: 2.38 ppm for Toluene, 1.70 ppm for MeCHD.

Table S4: Conversion of the *para*-quinone **3a** to the hydroquinone **4a** in the presence of the *ortho*-quinone **1a**.<sup>[a]</sup>

| Entry            | MeCHD (equiv) | <b>1a:3a</b> | <b>2a</b> Conv. <sup>[b]</sup> [%] | <b>4a</b> Conv. <sup>[b]</sup> [%] |
|------------------|---------------|--------------|------------------------------------|------------------------------------|
| 1                | 30            | 0:100        | /                                  | < 0.5                              |
| 2                | 30            | 10:90        | >99                                | < 1                                |
| 3                | 30            | 50:50        | >99                                | 4.5                                |
| 4                | 0             | 50:50        | < 0.5                              | < 0.5                              |
| 5 <sup>[c]</sup> | 0             | 50:50        | >99                                | < 0.5                              |

<sup>[a]</sup>Reaction conditions: **1a+3a** (0.18 mmol), Toluene (2.0 mL), 30 °C, 24 h. <sup>[b]</sup>Conversion was determined by <sup>1</sup>H NMR spectroscopy, <sup>[c]</sup>**2a** was used instead of **1a**.

Table S5: Oxygen effect on the reduction reaction of **1a** and **3a**.<sup>[a]</sup>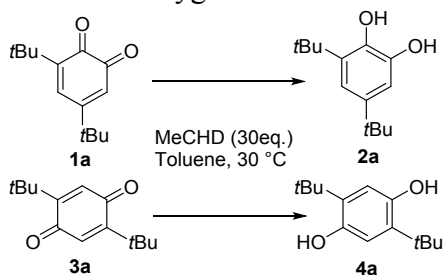

| Entry | Comp.     | Prod.     | <i>t</i> [h] | TFA [equiv] | Conv. <sup>[b]</sup> [%] |
|-------|-----------|-----------|--------------|-------------|--------------------------|
| 1     | <b>1a</b> | <b>2a</b> | 1            | /           | 55                       |
| 2     | <b>1a</b> | <b>2a</b> | 1            | /           | 71 <sup>[c]</sup>        |
| 3     | <b>3a</b> | <b>4a</b> | 5            | 40          | 45                       |
| 4     | <b>3a</b> | <b>4a</b> | 5            | 40          | 62 <sup>[c]</sup>        |

<sup>[a]</sup>Reaction conditions: **1a** or **3a** (0.18 mmol), 1-methyl-1,4-cyclohexadiene (5.4 mmol), toluene (2.0 mL), 30 °C. <sup>[b]</sup>Conversion was determined by <sup>1</sup>H NMR spectroscopy, <sup>[c]</sup>Experiment performed under nitrogen atmosphere.

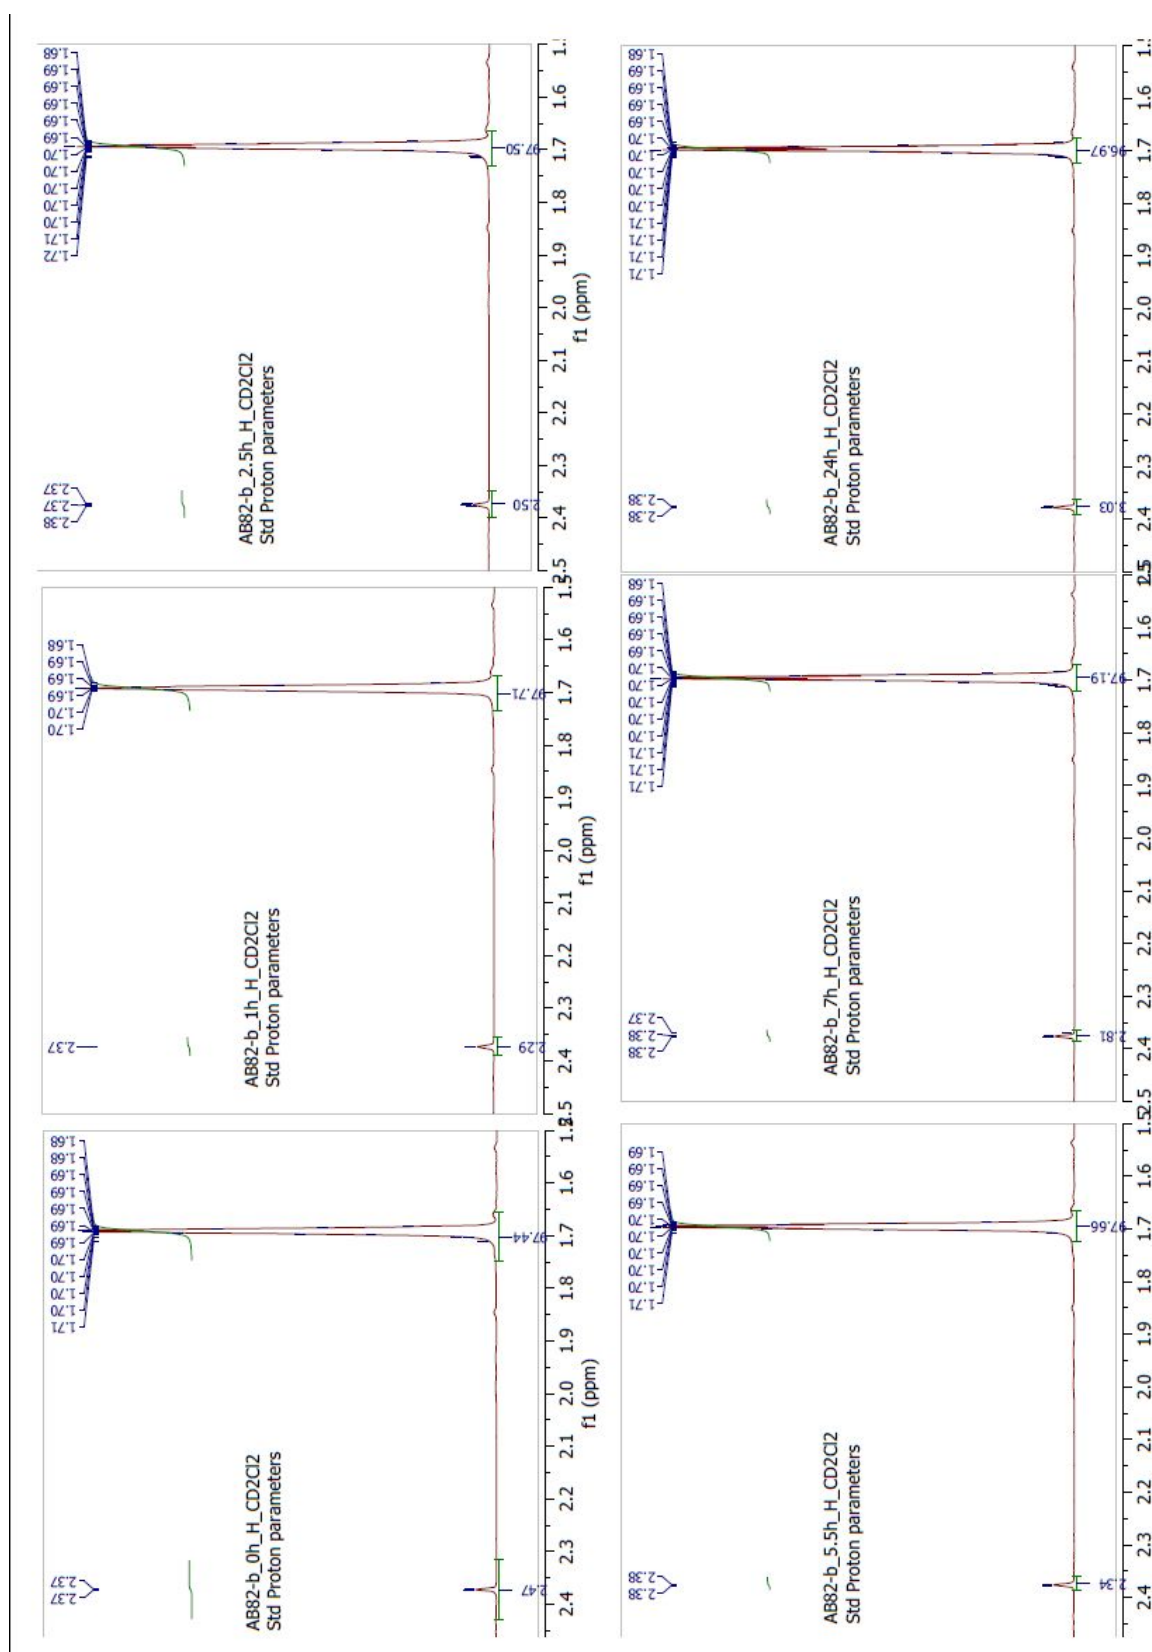

Figure S1. MeCHD conversion to toluene in absence of quinone **1a**.

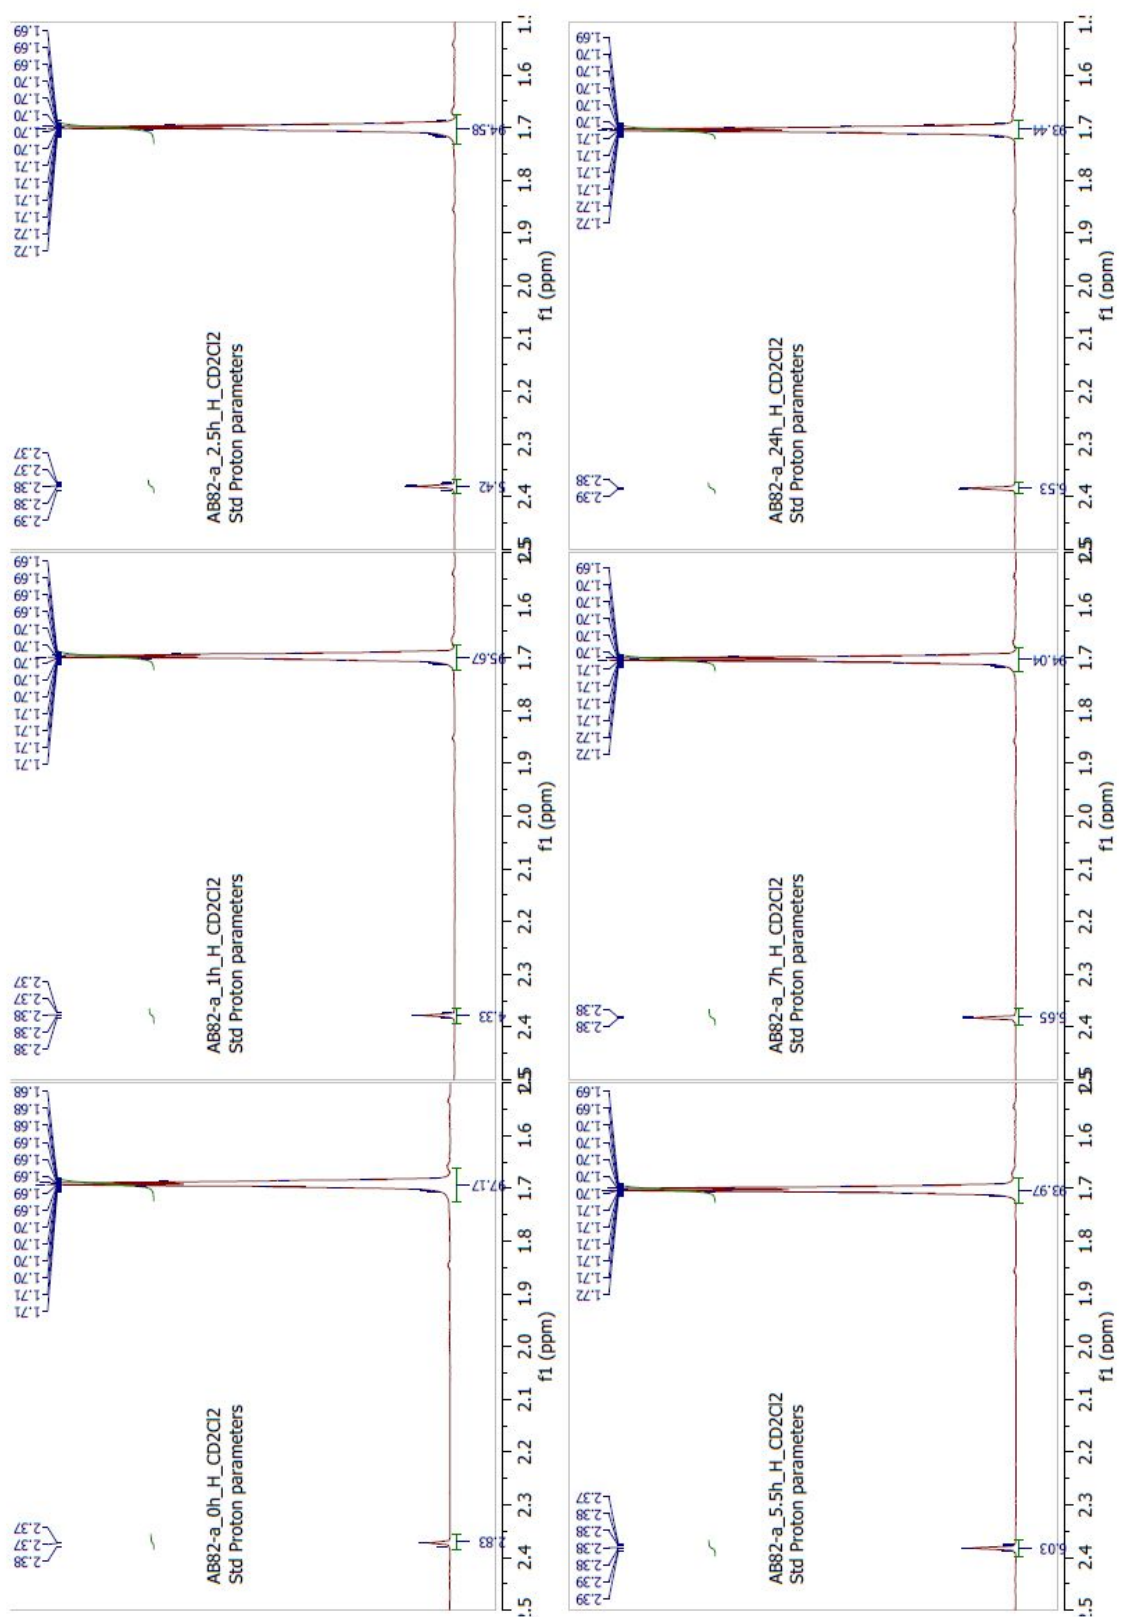

Figure S2. MeCHD conversion to toluene in presence of quinone **1a**.

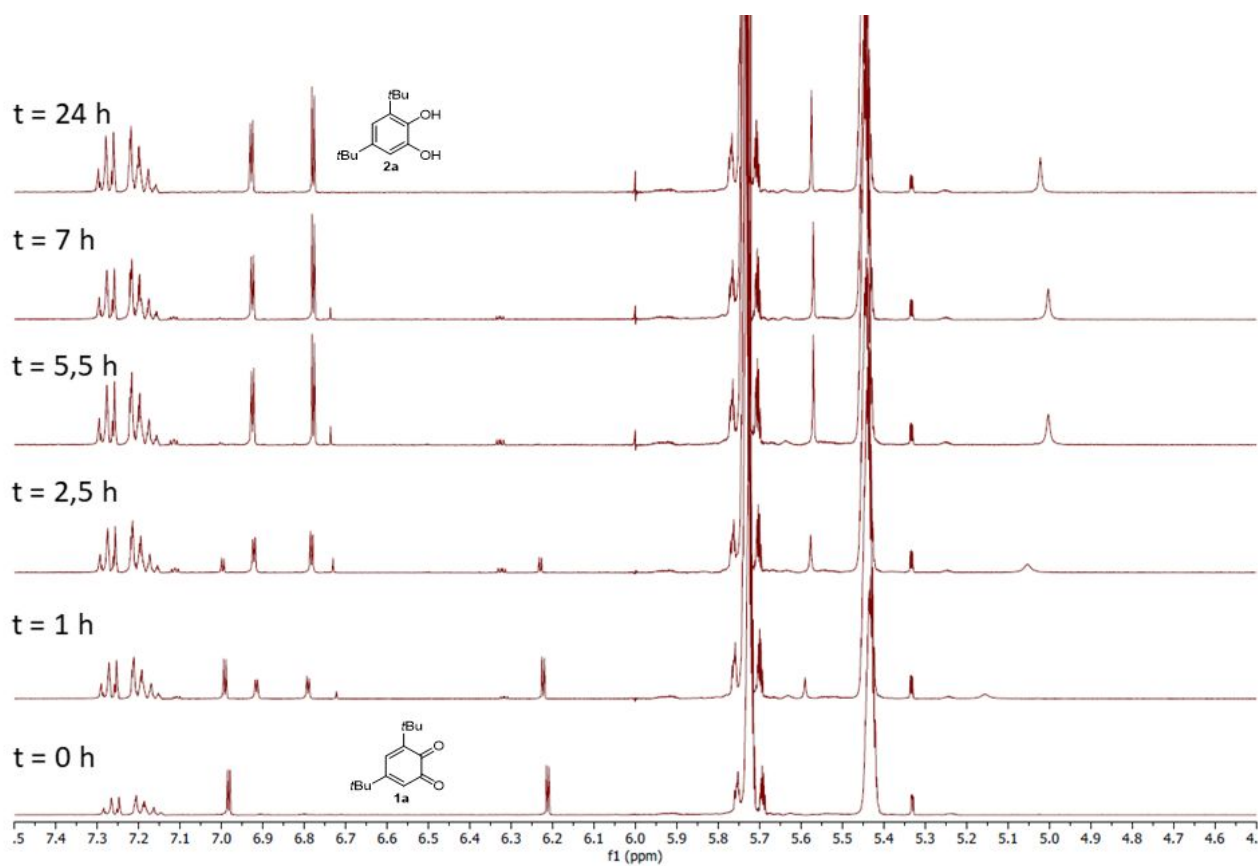

Figure S3. Conversion of compound **1a** to catechol **2a** in a NMR tube after 24 h. Experiment performed in  $\text{CD}_2\text{Cl}_2$  as solvent.

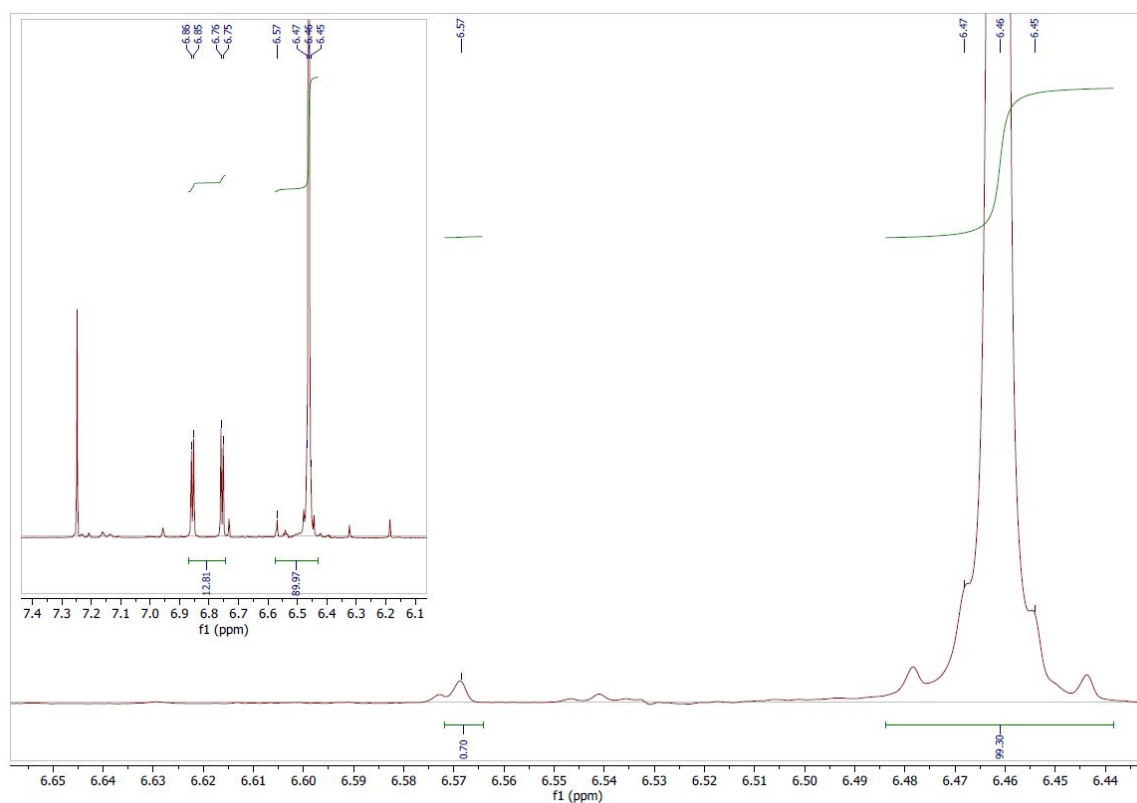

Figure S4. Conversion of compound **3a** (6.46 ppm) to hydroquinone **4a** (6.57 ppm) in the presence of 10% of **1a** (6.86 – 6.75ppm).

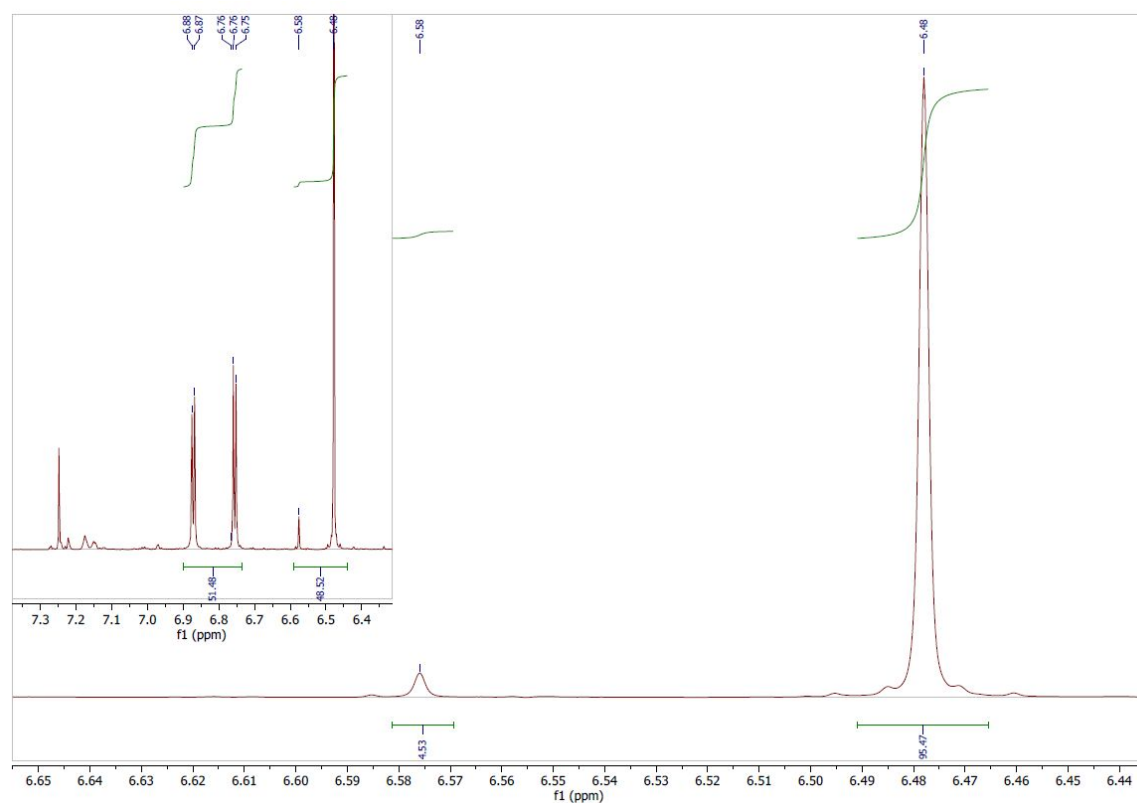

Figure S5. Conversion of compound **3a** (6.48 ppm) to hydroquinone **4a** (6.58 ppm) in the presence of 50% of **1a** (6.88 – 6.75ppm).

## Calculation results

MeCHD

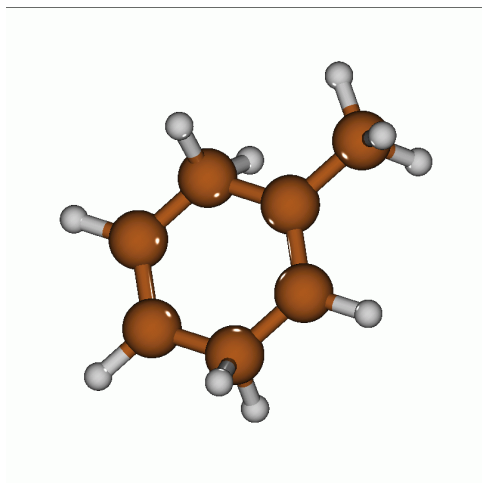

CBS-QB3 Enthalpy= -272.164977 CBS-QB3 Free Energy= -272.203348

No imaginary frequencies

C,0,-0.0787811878,-0.1034861486,-0

.0869357301\C,0,-0.0063476486,-0.0996329964,1.4156458034\C,0,1.1244187

133,-0.008416848,2.1180414246\C,0,2.4722387743,0.1023808941,1.44301784

77\C,0,2.4060505779,0.0991201444,-0.059412642\C,0,1.2687917812,0.00735

09239,-0.7431904888\H,0,-0.9527207987,-0.177520367,1.946139765\C,0,1.1

429134471,-0.0089634765,3.6229323731\H,0,2.9799877723,1.0153349738,1.7

910398294\H,0,3.3503316389,0.1768935316,-0.5916762037\H,0,1.2905815645

,0.0106882465,-1.8295570985\H,0,-0.5860846852,-1.0166256926,-0.4335352

926\H,0,-0.7274677817,0.7162783117,-0.4311740461\H,0,3.1211872618,-0.7

172893946,1.7885891941\H,0,1.7417079374,-0.842553157,4.0093427103\H,0,

1.5986789371,0.9096557946,4.0117265248\H,0,0.1367698011,-0.0916527348,

4.0387737128



MeCHD alkyl radical

(most stable isomer)

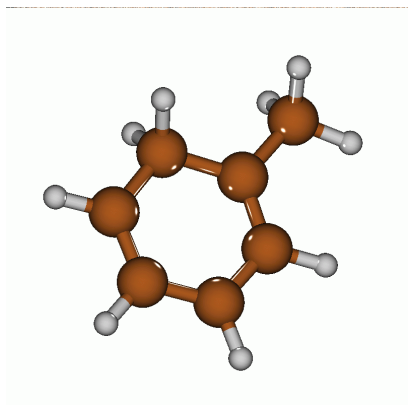

CBS-QB3 Enthalpy= -271.549665 CBS-QB3 Free Energy= -271.588237

(More stable of 1.23 kcal/mol than the isomer on C6)

No imaginary frequencies

C,0,-0.0046266383,0.0000025732,0.0515359345

\C,0,0.0860672715,0.0000754893,1.4647901112\C,0,1.3575553274,-0.000024

7762,2.0890826192\C,0,2.5227396356,-0.0001434669,1.3753942072\C,0,2.49

23356129,-0.0002157599,-0.1322979838\C,0,1.1141062368,-0.0001235438,-0

.726106327\C,0,3.8739575416,-0.0001879839,2.024533029\H,0,1.4064208173

,0.0000273718,3.1746221411\H,0,3.066663178,0.8657233046,-0.5103970728\

H,0,1.0320187869,-0.0001688812,-1.8079254068\H,0,-0.9838283557,0.00004

35382,-0.4168421167\H,0,-0.8121460019,0.0001563297,2.0694542785\H,0,3.

0665045464,-0.8663056125,-0.5102938156\H,0,4.4591154673,-0.8787481071,

1.7231470544\H,0,4.4591323923,0.8783900949,1.7232250611\H,0,3.79931563

14,-0.0002311139,3.1138140185

## Toluene

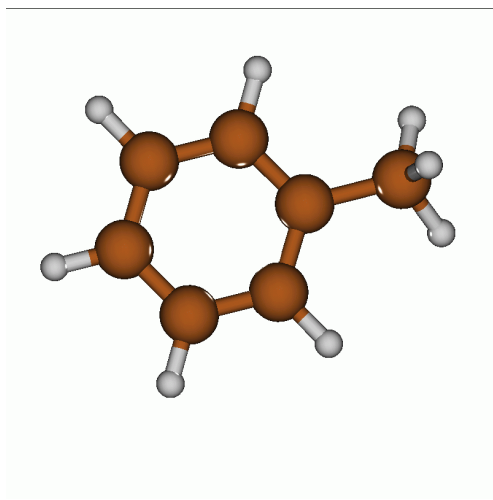

CBS-QB3 Enthalpy= -271.013230

CBS-QB3 Free Energy= -271.051271

No imaginary frequencies

C,0,0.0116868395,0.0151036436,0.0067474\C,0,  
0.0338945887,0.0109529665,1.40534287\C,0,1.238704321,-0.0024410963,2.1  
042070711\C,0,2.448674194,-0.0098325615,1.4137427051\C,0,2.4416489389,  
-0.0024410963,0.0206458743\C,0,1.2340099208,0.0109529665,-0.6733178602  
\H,0,-0.9036463588,0.0204962946,1.9526532351\H,0,1.232142791,-0.002952  
7708,3.1887678658\H,0,3.3875853037,-0.0169410219,1.955823287\H,0,3.377  
6253741,-0.0029527708,-0.5273169748\H,0,1.239224127,0.0204962946,-1.75  
89073203\C,0,-1.2958460554,-0.0024272324,-0.7481570689\H,0,-1.20437467  
44,0.4957132395,-1.7162711785\H,0,-1.6265280909,-1.0294400949,-0.93907  
64312\H,0,-2.0885217776,0.4957132395,-0.1848834744

### 3,5-di-methylcatechol

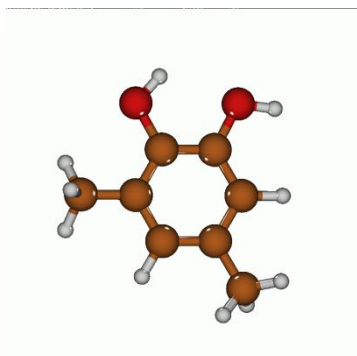

CBS-QB3 Enthalpy= -460.541498

CBS-QB3 Free Energy= -460.589309

No imaginary frequencies

C,0,0.0357424462,-0.0007135469,0

.0294106757\C,0,0.0000848981,-0.0240101374,1.4229008737\C,0,1.21664299

77,-0.0249595392,2.1168751133\C,0,2.4165577942,-0.0031618179,1.4219443

149\C,0,2.4347425336,0.0200850512,0.0217558578\C,0,1.2365255672,0.0215

105585,-0.690510451\O,0,3.6605279045,-0.0022473292,2.0177256861\O,0,3.

6233290097,0.0414690829,-0.654110749\C,0,1.2696605153,0.046622788,-2.1

961593274\H,0,-0.8979304371,0.0003720112,-0.5240226318\C,0,-1.30893849

95,-0.0477278072,2.1762035349\H,0,1.2273464979,-0.0427976935,3.2039837

626\H,0,3.5638962958,-0.0189942545,2.9743536454\H,0,4.3312899358,0.036

8218257,0.0024980877\H,0,0.2592652377,0.0449689714,-2.6085913725\H,0,1

.7927266818,0.9341789182,-2.5645293457\H,0,1.8073866102,-0.8194387459,

-2.59345892\H,0,-2.1574977544,-0.0434720409,1.489411885\H,0,-1.3947863

54,-0.9405089869,2.8041627735\H,0,-1.4097607291,0.8220026927,2.8335926

034

Phenoxyl radical from 3,5-di-methylcatechol (most stable isomer)

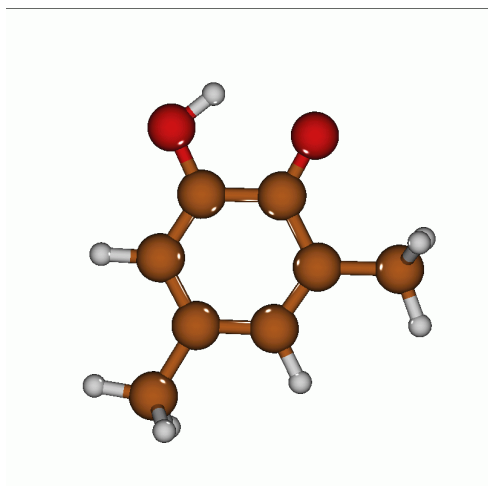

CBS-QB3 Enthalpy= -459.923251 CBS-QB3 Free Energy= -459.969991

No imaginary frequencies

C,0,0.0538210097,-0.052448066,0.020694

4563\C,0,0.0394835135,-0.0118546049,1.4454996965\C,0,1.2397188459,0.06

070454,2.1533254866\C,0,2.4353138713,0.0923562347,1.4543160451\C,0,2.4

760968851,0.051828271,-0.0073688345\C,0,1.2129373983,-0.0234209015,-0.

7143542369\O,0,3.6212534048,0.1613617298,2.0604752924\O,0,3.6018082898

,0.084715193,-0.5589484708\C,0,1.2468786871,-0.0652839647,-2.212895231

4\H,0,-0.899013324,-0.1087833317,-0.4976807677\C,0,-1.2799536632,-0.04

82871869,2.1665149996\H,0,1.2524811487,0.0926048151,3.2364046091\H,0,4

.26827428,0.1681373074,1.3236119087\H,0,0.2408552873,-0.1210685192,-2.

6318785395\H,0,1.7479245906,0.8207513756,-2.6137361051\H,0,1.823776382

3,-0.9262340712,-2.5632199959\H,0,-1.9107459942,0.7963526075,1.8696492

312\H,0,-1.834233088,-0.9603604504,1.9208570286\H,0,-1.1496107779,-0.0

110709776,3.2487847848

### 3,5-di-methyl orthoquinone

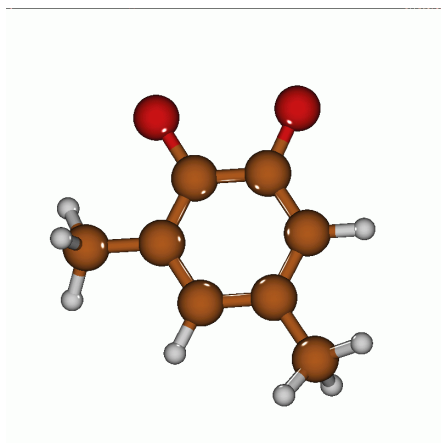

CBS-QB3 Enthalpy= -459.313646

CBS-QB3 Free Energy= -459.359148

No imaginary frequencies

C,0,0.0837404273,-0.0506020499,0.01827677

92\C,0,0.0689041716,-0.0031520019,1.4876064743\C,0,1.2190932724,0.0826

436149,2.1901863369\C,0,2.5184294117,0.131131807,1.5184591101\C,0,2.51

63979144,0.0789443271,-0.04305997\C,0,1.2024445623,-0.0146183386,-0.73

32595615\O,0,3.5758472081,0.2084469521,2.1075775543\O,0,3.564333646,0.

1150076883,-0.6487101389\C,0,1.2151286095,-0.062946311,-2.2309791128\H

,0,-0.8824681598,-0.1191292393,-0.474948336\C,0,-1.2766356302,-0.05460

9376,2.1538689576\H,0,1.230871293,0.1190764368,3.273892165\H,0,0.20397

72733,-0.1310352507,-2.6352321197\H,0,1.7026423009,0.8262761448,-2.640

7073859\H,0,1.797418664,-0.9189835732,-2.5836314608\H,0,-1.902858352,0

.7809591358,1.8224526881\H,0,-1.8066112978,-0.9738248697,1.8811897574\

H,0,-1.1910734764,-0.0135850964,3.2397391219

2,5MeQH2

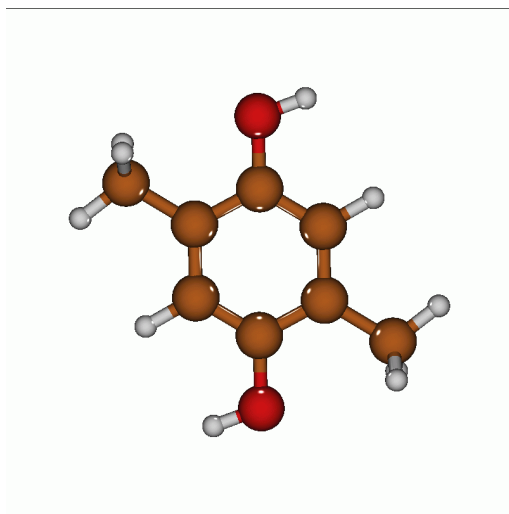

CBS-QB3 Enthalpy= -460.539744

CBS-QB3 Free Energy= -460.586115

No imaginary frequencies

C,0,-0.0167869338,0.0000242878,0.01421647

63\C,0,-0.0224297309,0.0000138424,1.4136457703\C,0,1.2118909102,-0.000

0057473,2.0642486853\C,0,2.4149377868,-0.0000218601,1.3603284457\C,0,2

.4204562911,-0.000010177,-0.0387918967\C,0,1.1859246506,0.0000146992,-

0.6895646918\C,0,-1.3258054415,0.0000203451,2.1678447156\O,0,3.6375765

238,-0.0000329792,1.990468449\O,0,-1.2397208551,0.0000389311,-0.615653

5187\H,0,1.2315150557,-0.0000031829,3.1514793297\C,0,3.7233426568,-0.0

000225882,-0.793173988\H,0,1.1668226538,0.0000227693,-1.7768292829\H,0

,-1.1008488141,0.0000738325,-1.5676658302\H,0,3.4985389648,-0.00018693

64,2.9424345386\H,0,-1.928895973,0.8766978808,1.9136096736\H,0,-1.9287

928441,-0.8767886455,1.913809474\H,0,-1.1552739069,0.0001486424,3.2460

964559\H,0,3.5524978853,-0.0000258559,-1.8715010245\H,0,4.3265271036,0

.87683402,-0.5396446162\H,0,4.3265131046,-0.8768859795,-0.539635265

# Radical from 2,5-dimethyl-hydroquinone

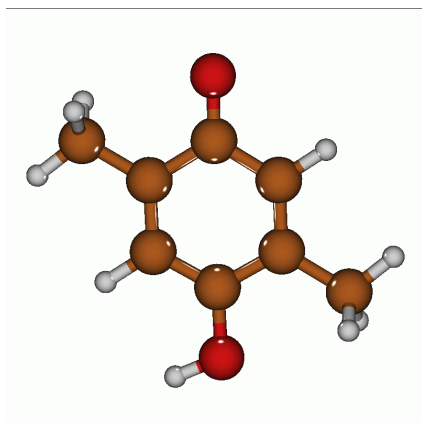

CBS-QB3 Enthalpy= -459.913793

CBS-QB3 Free Energy= -459.960006

No imaginary frequencies

C,0,-0.0672217979,0.0000316699,-0.01104

58063\C,0,-0.0260274209,0.0000119919,1.4526346272\C,0,1.1971669634,-0.

0000166954,2.0839574341\C,0,2.4002059716,-0.0000307986,1.3541919876\C,

0,2.415371561,-0.0000165795,-0.0678720668\C,0,1.2042488972,0.000012989

3,-0.7102106184\C,0,-1.3263112439,0.0000159136,2.1951365166\O,0,3.6075

243592,-0.0000582623,1.9725161048\O,0,-1.1542833704,0.0000581839,-0.62

5824652\H,0,1.2468784996,-0.0000282866,3.1710142417\C,0,3.7323777667,-

0.0000330673,-0.7980520646\H,0,1.1494165843,0.0000253718,-1.7932073638

\H,0,3.4830362819,-0.0000732097,2.928412326\H,0,-1.9249538338,0.872920

2058,1.9196506553\H,0,-1.9248727812,-0.872994841,1.9198032107\H,0,-1.1

736057746,0.0001098366,3.2760155213\H,0,3.572801059,-0.0000286224,-1.8

768050302\H,0,4.329389412,0.8775668728,-0.5343052085\H,0,4.3293655753,

-0.8776499609,-0.5343082356

## 2,5-dimethyl-para benzoquinone

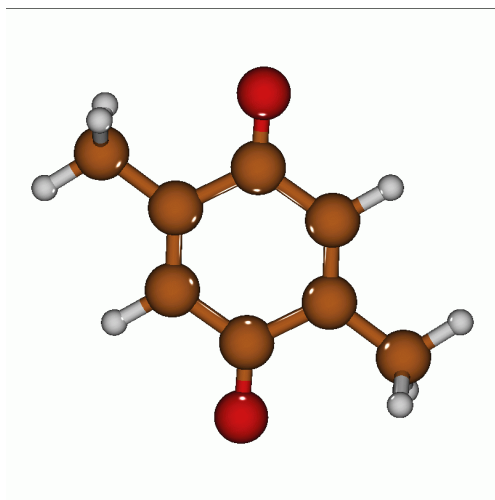

CBS-QB3 Enthalpy= -459.328177

CBS-QB3 Free Energy= -459.373569

No imaginary frequencies

C,0,-0.0594448586,0.0000059266,-0.00564302

54\C,0,-0.0239823974,0.0000208585,1.4943871112\C,0,1.1683244096,0.0000

178304,2.1127202737\C,0,2.4537125254,-0.0000061674,1.381924252\C,0,2.4

182192156,-0.0000079059,-0.1180232195\C,0,1.2259210918,-0.0000039976,-

0.7364474763\C,0,-1.3426754495,0.0000256135,2.2028462748\O,0,3.5169351

589,0.0000052115,1.9804793927\O,0,-1.1225923423,0.0000132214,-0.604130

1024\H,0,1.2576904895,0.0000296544,3.1942755578\C,0,3.736896581,-0.000

0167052,-0.8265364789\H,0,1.1365703918,-0.0000100879,-1.8179958997\H,0

, -1.9326261606,0.8740291682,1.9134508383\H,0,-1.932559745,-0.874068405

1,1.9135826357\H,0,-1.2094153906,0.0001067837,3.2851777095\H,0,3.60354

74182,-0.0000230691,-1.9088403367\H,0,4.3267903971,0.8740345188,-0.537

195107\H,0,4.3267845068,-0.8740680616,-0.537183786



O-protonated 2,5-dimethyl-para benzoquinone

cbs-qb3 geom=check scrf=(solvent=toluene)

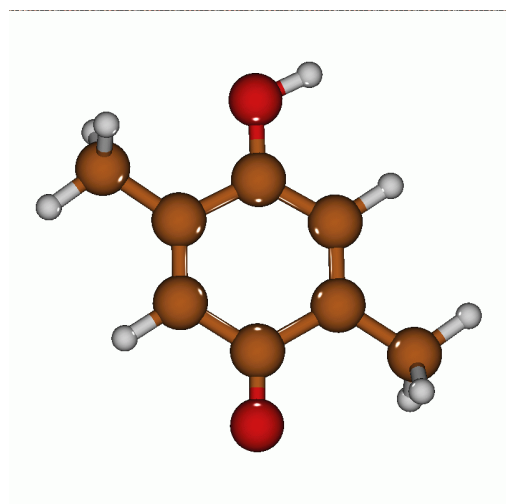

CBS-QB3 Enthalpy= -459.686027

CBS-QB3 Free Energy= -459.732043

C,0,-0.0608438749,0.0000406645,-0.010664692\C,  
0,-0.03455444,0.0000159205,1.5047341727\C,0,1.1756051843,-0.0000044993  
,2.1166718542\C,0,2.3784644145,-0.0000215846,1.3481747801\C,0,2.420253  
8016,-0.0000163338,-0.1129730139\C,0,1.2281847264,0.0000077291,-0.7428  
925661\C,0,-1.3314610124,0.000012467,2.2184788841\O,0,3.5371150142,-0.  
0000486382,1.92963604\O,0,-1.1182847191,0.0000501673,-0.6021245158\H,0  
,1.2613910705,-0.0000111026,3.1978200386\C,0,3.749151736,-0.0000384578  
, -0.8052414721\H,0,1.1516762109,0.0000116593,-1.8236887049\H,0,3.47935  
90076,-0.0000545072,2.9012510287\H,0,-1.9220841675,0.8718036224,1.9180  
835583\H,0,-1.9220300741,-0.8718395772,1.9181467991\H,0,-1.2015715827,  
0.0000484102,3.2990411669\H,0,3.612067005,-0.0000314186,-1.8852190733\  
H,0,4.3340512601,0.8792889793,-0.5237628116\H,0,4.334017148,-0.8793907  
886,-0.5237698937

2,5-dimethyl-para hydroquinone radical cation

cbs-qb3 geom=check scrf=(solvent=toluene)

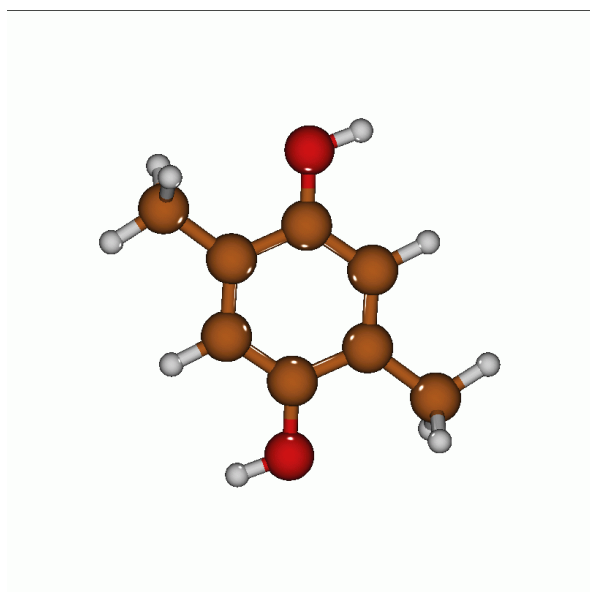

CBS-QB3 Enthalpy= -460.304174

CBS-QB3 Free Energy= -460.350363

C,0,-0.0108249071,0.0011574156,-0.041711635

4\C,0,0.0002826507,0.017663445,1.370977061\C,0,1.2300797442,0.00356429  
13,2.1256894309\C,0,2.4006956952,0.0012340417,1.4100698797\C,0,2.38958  
79401,0.0178192026,-0.0026167622\C,0,1.1597897591,0.0036456155,-0.7573  
306506\O,0,-1.1100857418,0.0442952752,2.0878473926\C,0,1.1829222501,-0  
.004305479,3.6201352089\O,0,3.499951754,0.0445947531,-0.7194879549\C,0  
,1.2069485359,-0.0042387642,-2.2517756638\H,0,3.3534508191,-0.01658587  
57,1.9279483084\H,0,-0.9635798841,-0.0167163417,-0.5595884125\H,0,-1.9  
045340427,0.0717775707,1.5333806269\H,0,4.2944004764,0.0721281368,-0.1  
650240026\H,0,0.6537872816,0.8772726807,3.9927521282\H,0,0.6324428875,  
-0.8763914268,3.9839650187\H,0,2.1861729762,-0.0183346431,4.042623131\  
H,0,0.2036897012,-0.0175346333,-2.6742677072\H,0,1.7367853074,0.876891  
7553,-2.6244227394\H,0,1.756737003,-0.8767876772,-2.6155696163

2,5MeQH2 (in toluene)

cbs-qb3 geom=check scrf=(solvent=toluene)

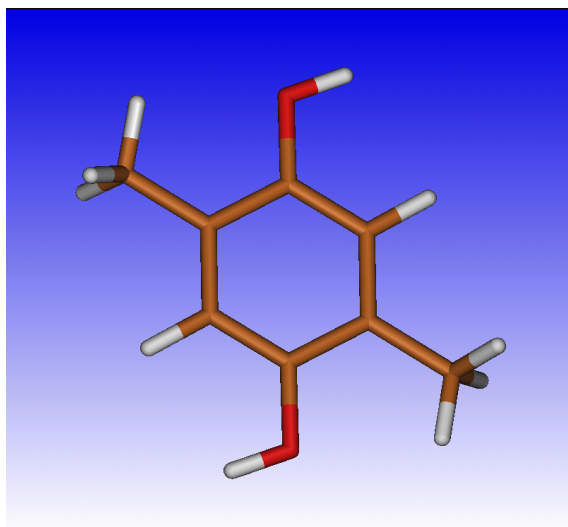

CBS-QB3 Enthalpy= -460.544148

CBS-QB3 Free Energy= -460.590657

C,0,0.0035608738,0.0102658609,-0.0082258884\C,0,-  
0.005135956,0.010424762,1.3858349108\C,0,1.1957090876,0.0102340337,2.1  
054174335\C,0,2.3863118363,0.0102472847,1.3765896052\C,0,2.3950083266,  
0.0104553172,-0.0174848957\C,0,1.1941779291,0.0102794146,-0.7370598397  
\O,0,-1.1725416845,0.0103661697,2.1134655544\C,0,1.1820402182,0.009881  
6509,3.611557352\O,0,3.5624294222,0.0103961133,-0.7450947742\C,0,1.207  
8220507,0.0099414709,-2.2432012541\H,0,3.3316254948,0.0098161363,1.913  
4883363\H,0,-0.9417430202,0.0098806782,-0.5451412342\H,0,-1.9208440608  
,0.0098592774,1.5075922211\H,0,4.3107200712,0.0101589502,-0.139207076\  
H,0,0.6584408174,0.887261276,4.0030157994\H,0,0.6570260302,-0.86691007  
06,4.0025803558\H,0,2.1972132562,0.0090401835,4.0123883873\H,0,0.19264  
13436,0.0095769834,-2.6440142557\H,0,1.7318308189,0.8870734869,-2.6346  
567204\H,0,1.7324073507,-0.8670996367,-2.6342509761

2,5MeQH2 tautomer hydride addition C1

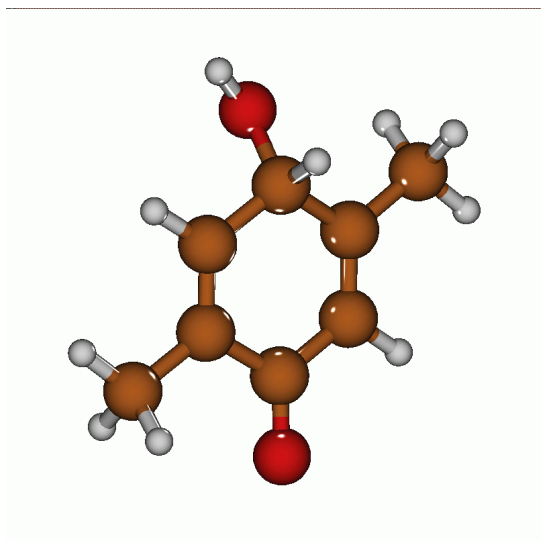

CBS-QB3 Enthalpy= -460.510604

CBS-QB3 Free Energy= -460.557201

C,0,0.0135926728,0.0095175641,-0.0064402233\C,0,0  
.0052914373,0.0113660578,1.4659000551\C,0,1.3225294474,-0.0501020703,2  
.1629829179\C,0,2.4375725507,-0.1769824482,1.4327248797\C,0,2.46376959  
01,-0.3074955062,-0.0638715032\C,0,1.1312105415,-0.096512229,-0.740485  
0453\O,0,-1.0427603358,0.0817854778,2.0972948891\C,0,1.3040940261,0.04  
9991656,3.6606725167\O,0,3.4121115579,0.5943052464,-0.6544106666\C,0,1  
.1366583668,-0.0588243869,-2.2389280725\H,0,3.4098502877,-0.2167851599  
,1.9193382926\H,0,-0.9600432935,0.1144231794,-0.4739558263\H,0,4.29664  
98703,0.2821600403,-0.4375134865\H,0,0.8392683128,0.9872811274,3.97852  
89198\H,0,0.7020298675,-0.7539479673,4.0927071611\H,0,2.3130277502,-0.  
0019523285,4.0732147261\H,0,0.1268056489,0.0496169002,-2.636101394\H,0  
,1.7533268306,0.7724621719,-2.5899232967\H,0,1.5789698947,-0.972556034  
1,-2.6510863726\H,0,2.7631439866,-1.34463194,-0.2995715614

## 2,5MeQH2 tautomer hydride addition C3

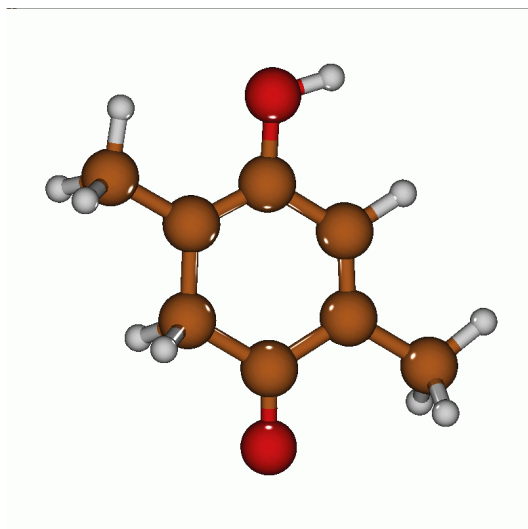

CBS-QB3 Enthalpy= -460.516286

CBS-QB3 Free Energy= -460.564729

C,0,-0.0615542356,0.245630152,-0.0074987168\C,0,-  
0.0074566228,0.2185189179,1.5150037205\C,0,1.3099117996,0.0297718421,2  
.152367147\C,0,2.397743289,-0.1088562017,1.3601618918\C,0,2.367780319,  
-0.0857001186,-0.0931297362\C,0,1.2176970026,0.080675325,-0.7754647754  
\O,0,-1.0275540781,0.3496870814,2.1765650865\C,0,1.3599614078,0.003347  
4316,3.651267265\O,0,3.5582734721,-0.2399778328,-0.7682634392\C,0,1.14  
67718092,0.1099878073,-2.2730581466\H,0,3.3710883252,-0.2483533732,1.8  
291820367\H,0,-0.7818662564,-0.5274016131,-0.3085158866\H,0,4.27553091  
28,-0.3451567655,-0.1359887784\H,0,0.9658382223,0.9349025208,4.0676822  
503\H,0,0.7283742005,-0.7982427895,4.045066306\H,0,2.379149253,-0.1410  
213737,4.0137890832\H,0,0.4903823909,-0.6833974293,-2.6500469614\H,0,0  
.7278276975,1.0594659441,-2.6271635243\H,0,2.1311797505,-0.0182801505,  
-2.7205949238\H,0,-0.5469846659,1.1909580689,-0.2863055834

2,5MeQH2 tautomer hydride addition C5

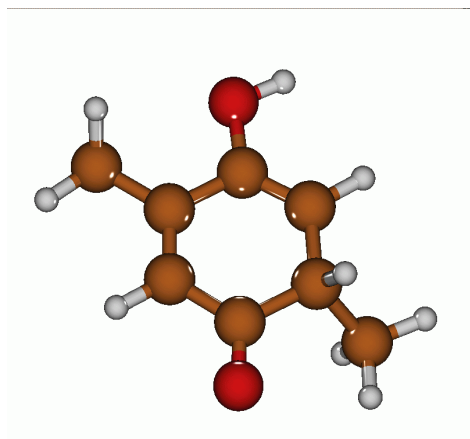

CBS-QB3 Enthalpy= -460.514455

CBS-QB3 Free Energy= -460.560755

C,0,-0.0354512093,-0.1714931408,0.0297474399\C,0,  
-0.0638056374,-0.4392526063,1.4660738032\C,0,1.2775512969,-0.578263653  
9,2.196100776\C,0,2.4880674336,-0.3717060141,1.3344468535\C,0,2.405677  
322,-0.113089597,0.0203513301\C,0,1.1118494312,-0.0099937849,-0.669441  
566\O,0,-1.1171328529,-0.5563693072,2.0786474331\C,0,1.2977448278,0.32  
04696889,3.4515526706\O,0,3.4814347077,0.0802792299,-0.8054683209\C,0,  
1.1173741707,0.2787587504,-2.1420519294\H,0,3.4603428875,-0.4426980572  
,1.8158750141\H,0,-1.0007034025,-0.0886674107,-0.4575999081\H,0,4.2932  
814855,0.0019915268,-0.2915450235\H,0,1.3170650647,1.3760697381,3.1688  
663294\H,0,0.4036112973,0.1350969073,4.0473072781\H,0,2.1803945359,0.1  
124793784,4.0609472336\H,0,0.1016131417,0.3313993622,-2.533672441\H,0,  
1.6295303539,1.2230694987,-2.3473962863\H,0,1.6699733778,-0.4942355287  
, -2.6837386917\H,0,1.2883288096,-1.6207256291,2.5496333718

MeCHD(-H<sup>+</sup>)

cbs-qb3 geom=check scrf=(solvent=toluene)

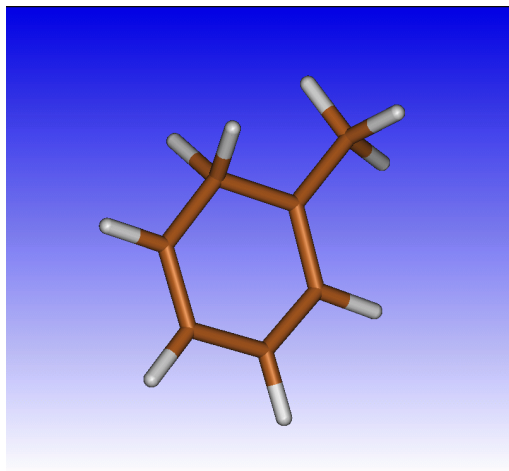

CBS-QB3 Enthalpy= -271.348264

CBS-QB3 Free Energy= -271.386823

C,0,0.0009904163,0.0407302422,0.0006532001\C,0,0.  
0019610067,0.0207256209,1.3619109214\C,0,1.2421932609,-0.0319213455,2.  
0394712906\C,0,2.4757736063,-0.0567330022,1.380352316\C,0,2.5307187415  
, -0.0229975845,0.0006838971\C,0,1.2613609079,0.0068485857,-0.760168706  
4\C,0,3.8194265189,0.0066276779,-0.7414144422\H,0,3.389353892,-0.09521  
36968,1.9603847253\H,0,1.2788734564,0.8353639676,-1.4887301909\H,0,-0.  
9264053784,0.0711053268,-0.5595213745\H,0,-0.9203147706,0.0406174325,1  
.9270889892\H,0,1.2368452007,-0.0533949833,3.1242946403\H,0,1.23524340  
65,-0.8677168134,-1.4367044153\H,0,3.7819069852,-0.6135420302,-1.63976  
41558\H,0,4.0157362399,1.0338054341,-1.0761821887\H,0,4.653807947,-0.3  
053765173,-0.1146599997

MeCHD

cbs-qb3 geom=check scrf=(solvent=toluene)

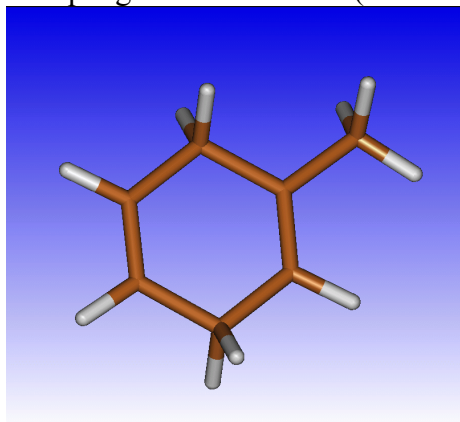

CBS-QB3 Enthalpy= -272.165916

CBS-QB3 Free Energy= -272.204271

C,0,-0.0793069454,-0.1035290474,-0.0874741998\C,0,-0.  
0068817019,-0.0996867483,1.4155571449\C,0,1.1242420096,-0.0084340306,2  
.1183798087\C,0,2.4724630484,0.1024092261,1.443498773\C,0,2.406319409,  
0.0991473358,-0.0592506456\C,0,1.2687066117,0.0073411817,-0.7435979565  
\H,0,-0.9535789174,-0.1775973537,1.9456292083\C,0,1.1431027809,-0.0089  
494851,3.6234463878\H,0,2.9803954663,1.0149645655,1.7917602158\H,0,3.3  
510540408,0.176949526,-0.590905787\H,0,1.2900663208,0.0106270828,-1.83  
00838662\H,0,-0.5869343224,-1.0161584674,-0.4345834247\H,0,-0.72822085  
02,0.7156957988,-0.4322079672\H,0,3.1215420715,-0.7168284527,1.7893098  
422\H,0,1.7425959362,-0.842314209,4.009061158\H,0,1.5996439092,0.90953  
48328,4.0114496414\H,0,0.137047238,-0.0916097501,4.0397793501

H

CBS-QB3 Enthalpy= -0.497457 CBS-QB3 Free Energy= -0.510472



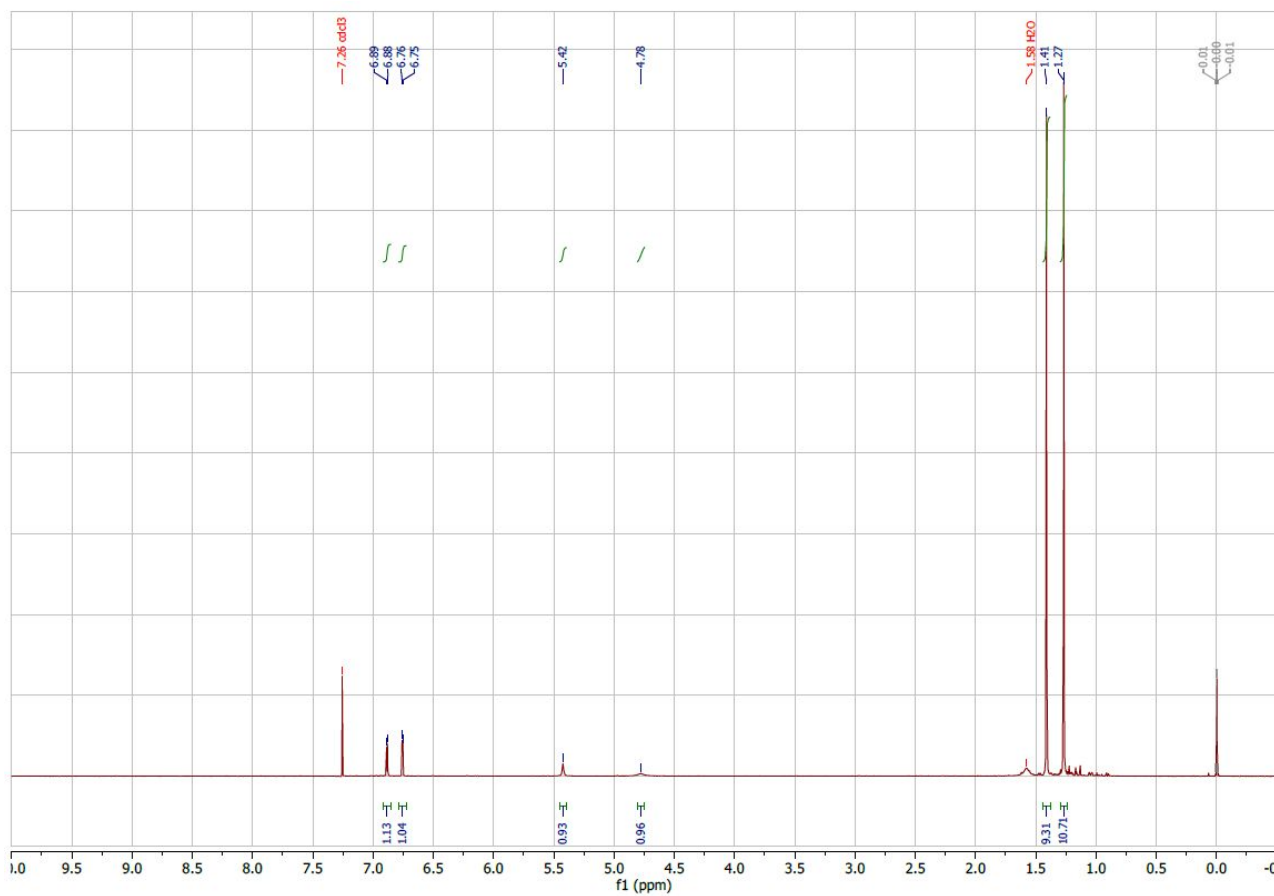

Figure S6. <sup>1</sup>H NMR spectrum of compound **2a**.

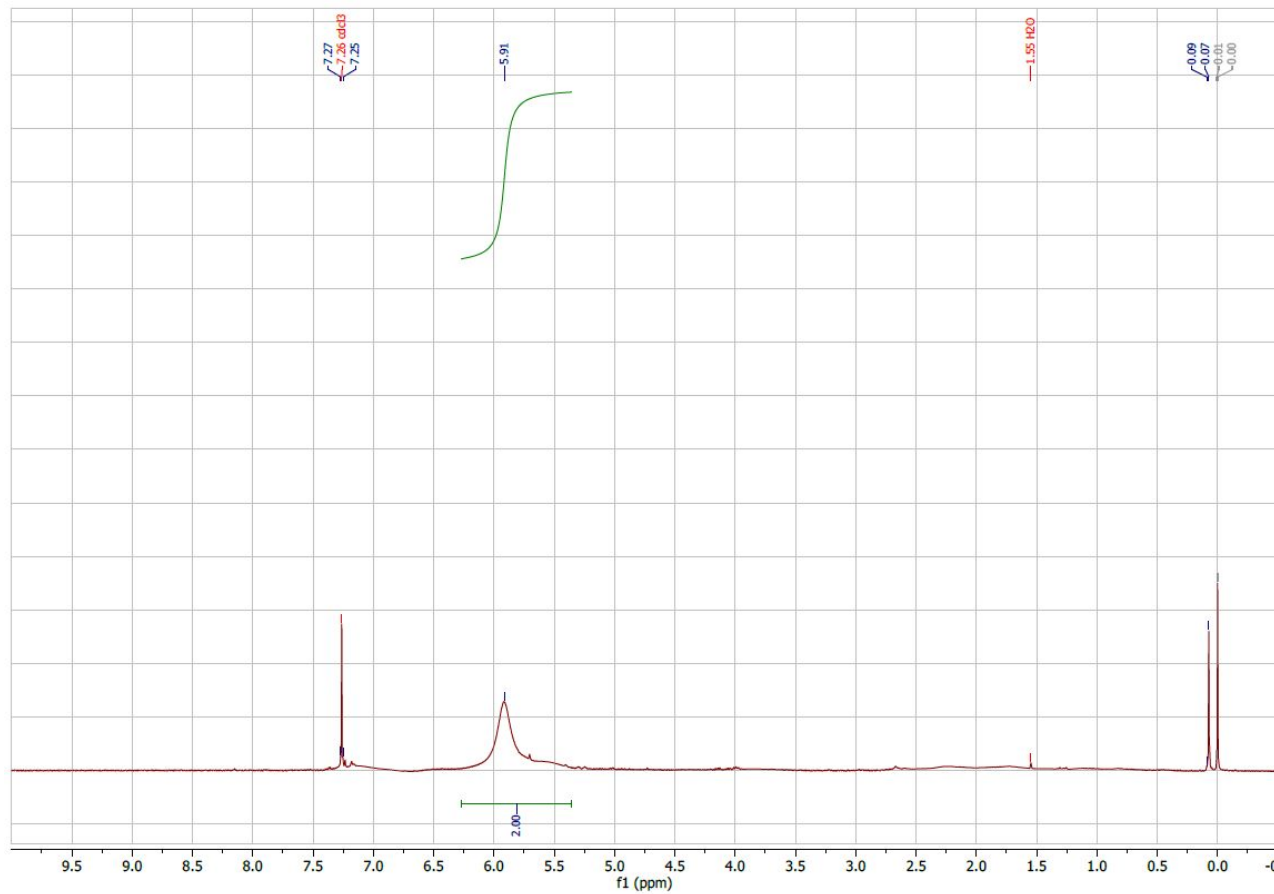

Figure S7. <sup>1</sup>H NMR spectrum of compound **2b**

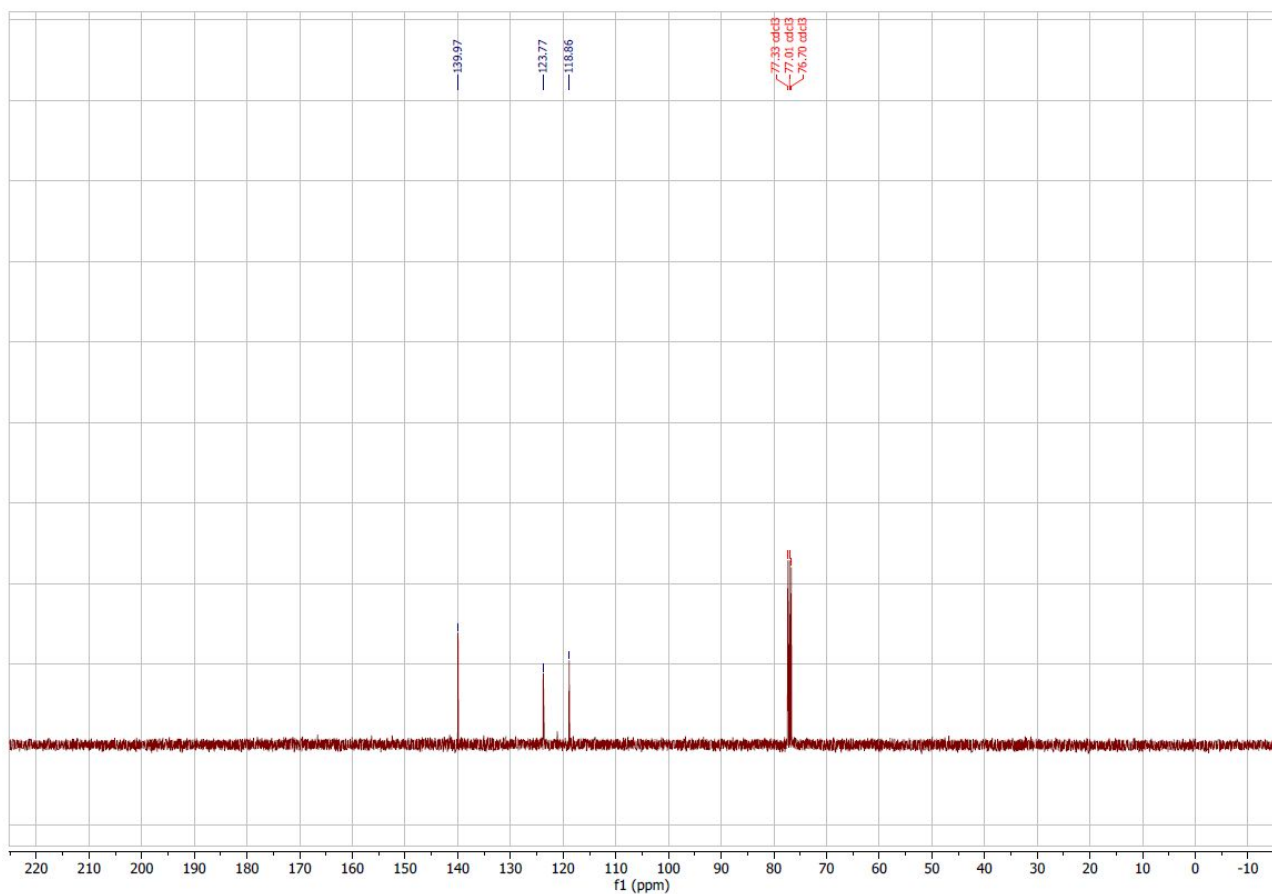

Figure S8.  $^{13}\text{C}\{^1\text{H}\}$  NMR spectrum of compound **2b**.

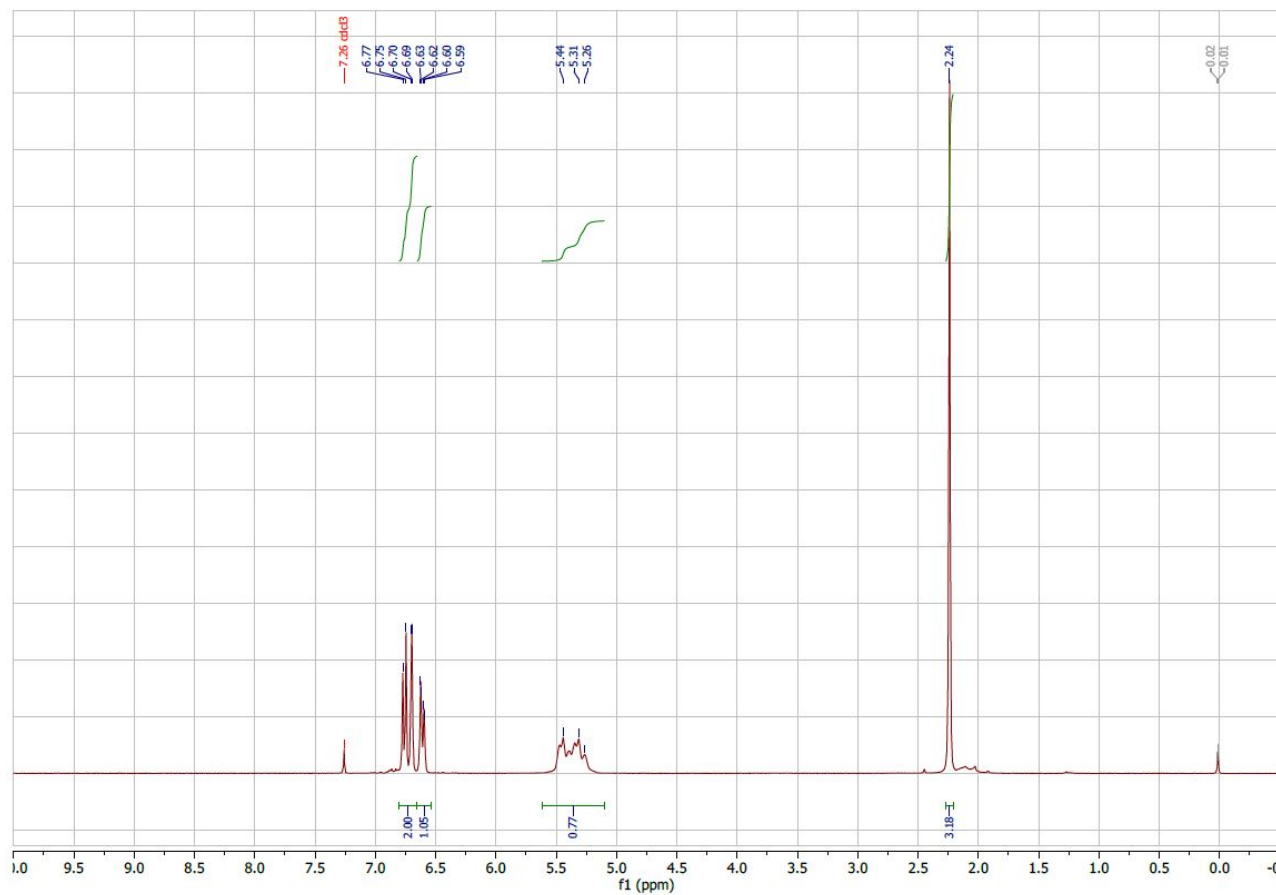

Figure S9.  $^1\text{H}$  NMR spectrum of compound **2c**.

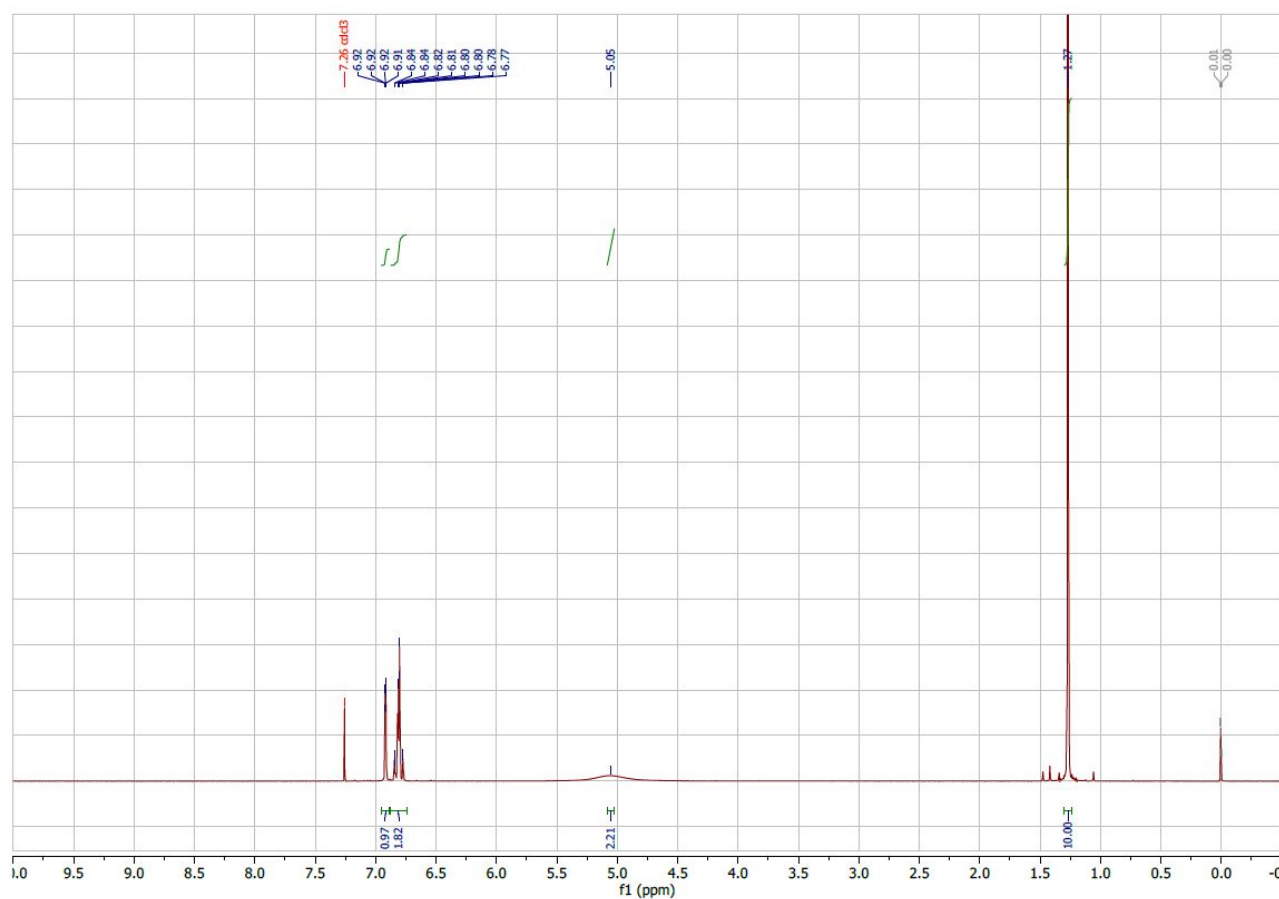

Figure S10. <sup>1</sup>H NMR spectrum of compound **2d**.

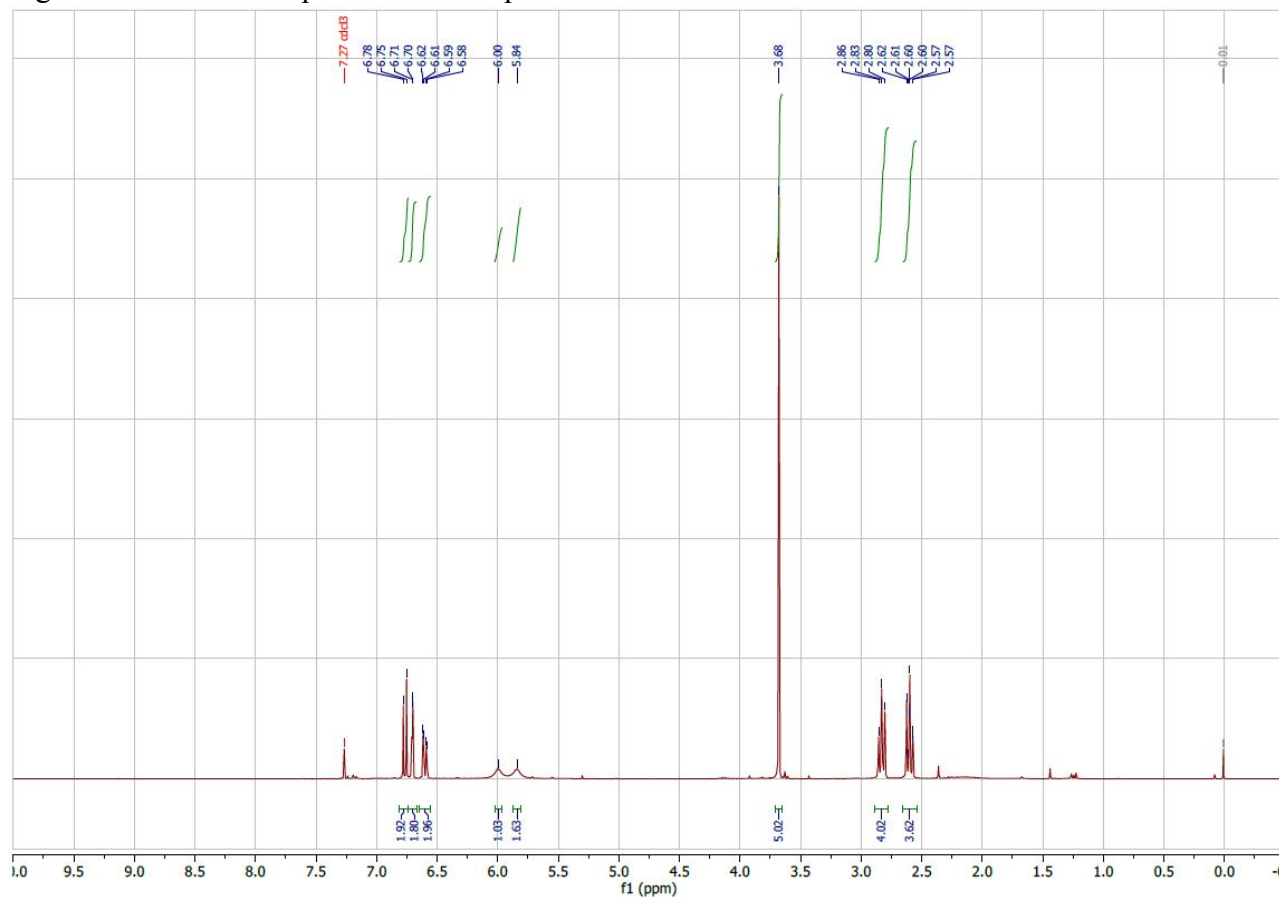

Figure S11. <sup>1</sup>H NMR spectrum of compound **2e**.

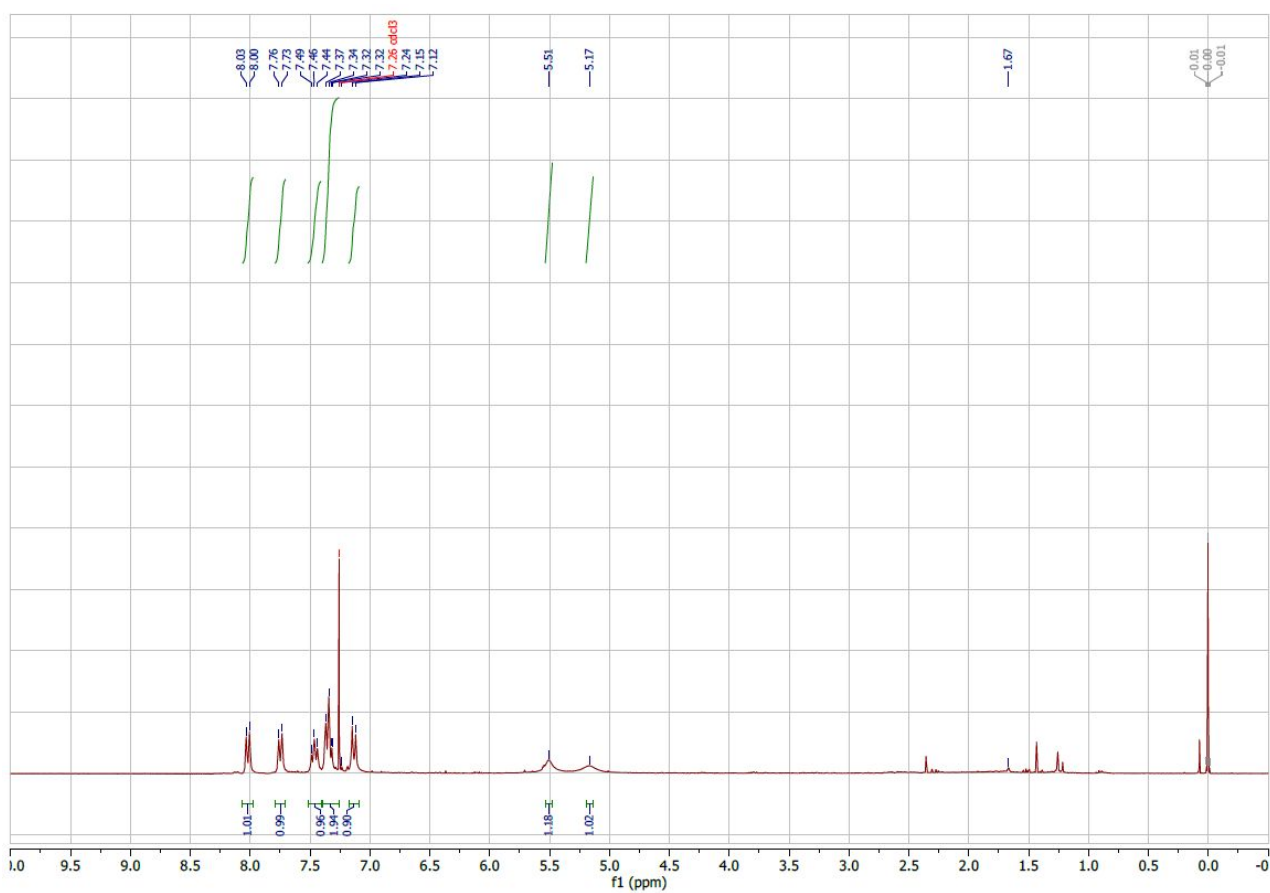

Figure S12. <sup>1</sup>H NMR spectrum of compound **2f**.

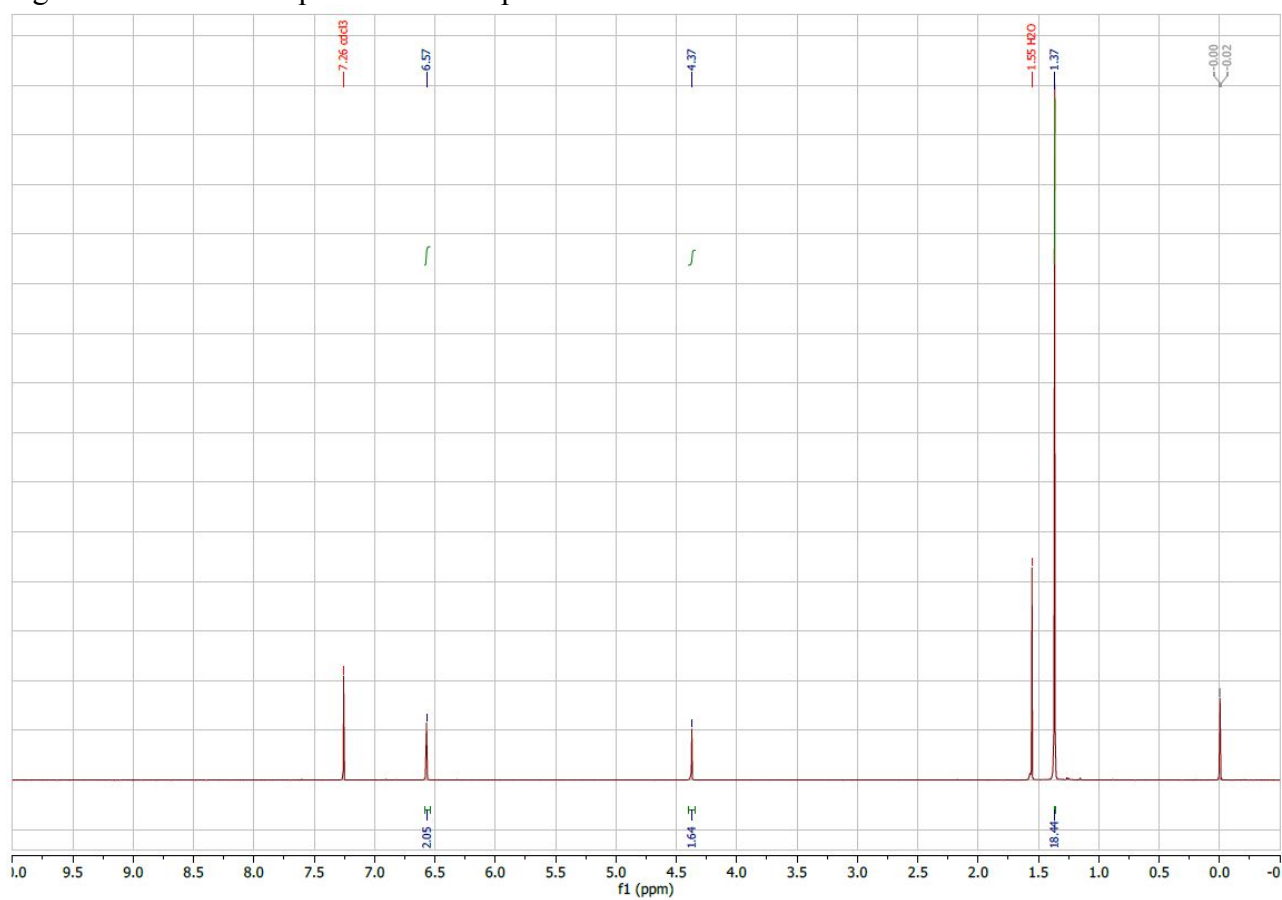

Figure S13. <sup>1</sup>H NMR spectrum of compound **4a**.

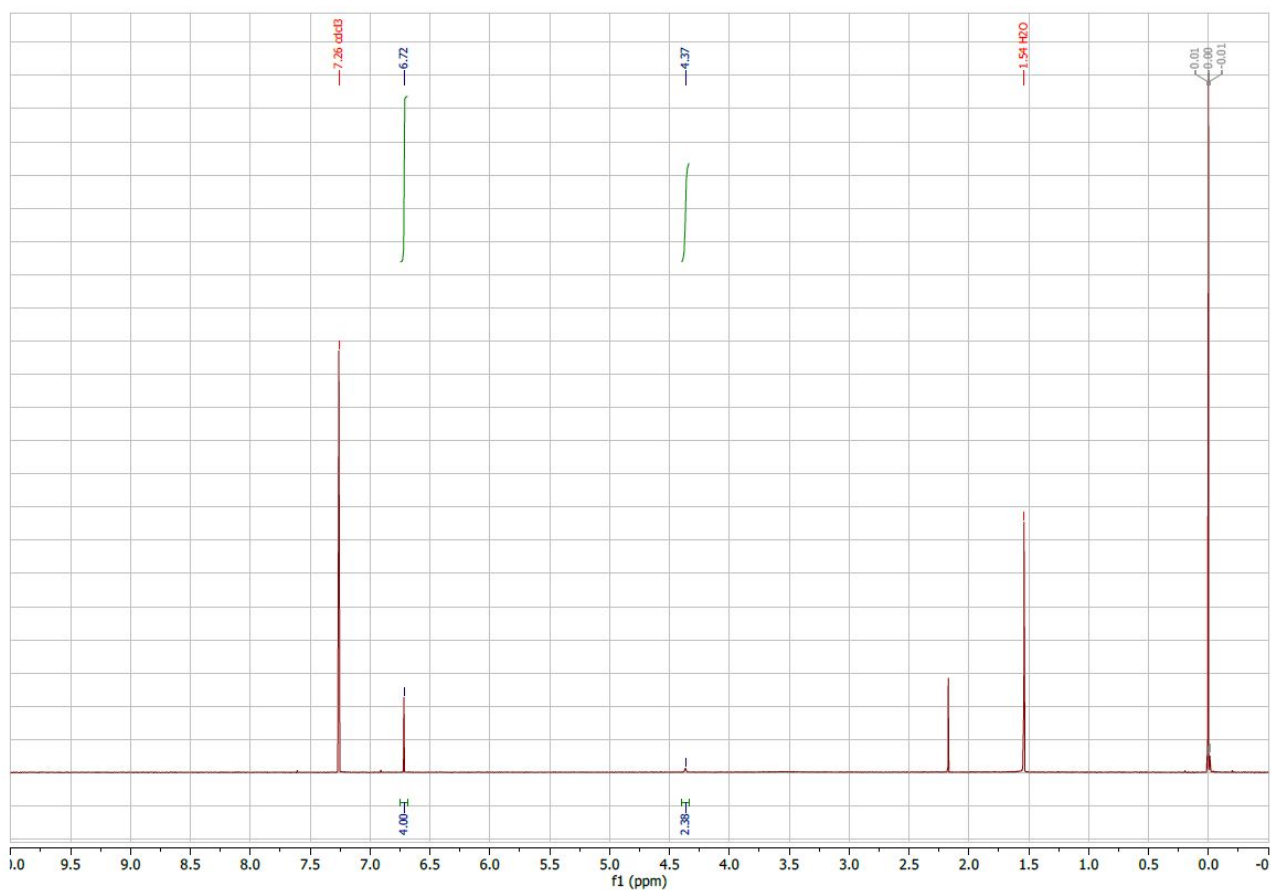

Figure S14. <sup>1</sup>H NMR spectrum of compound **4b**.

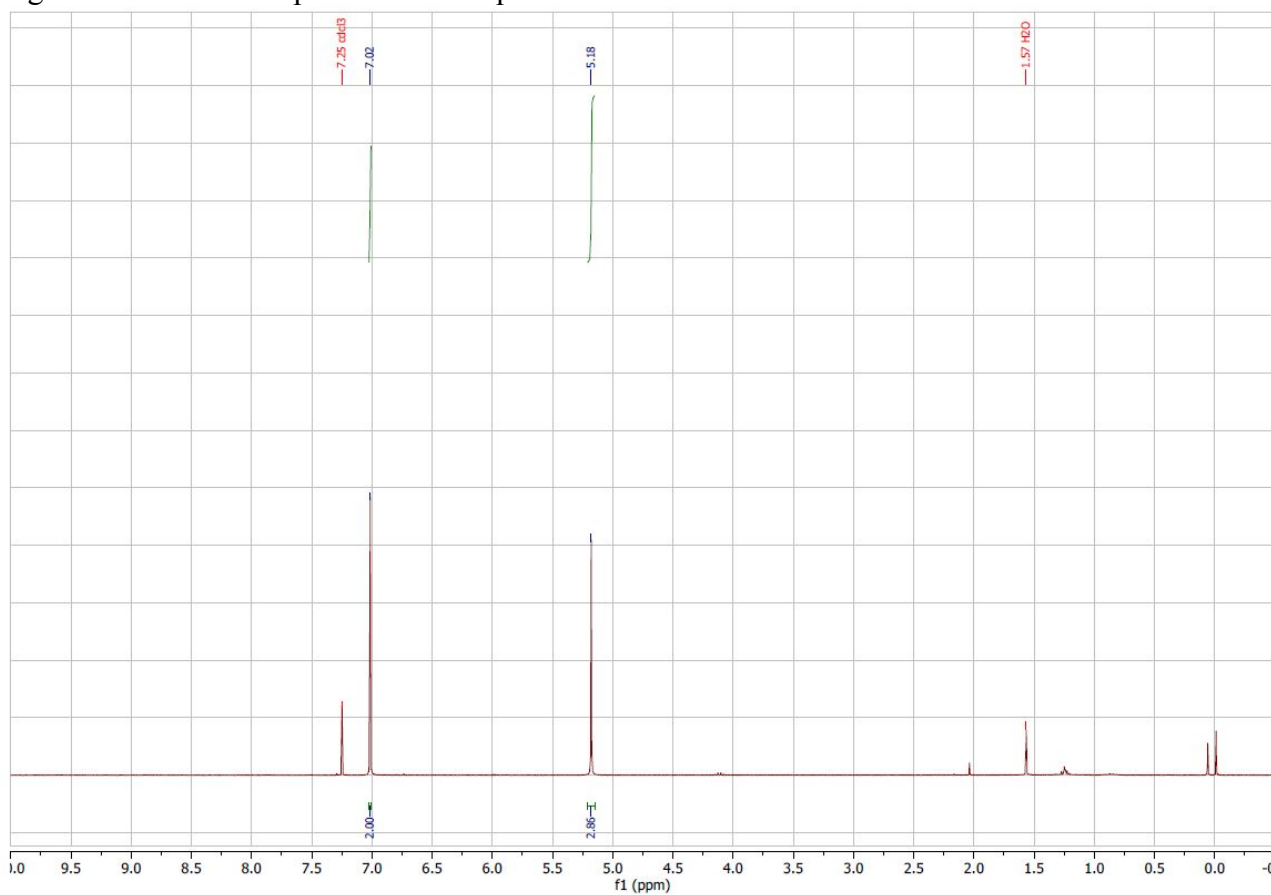

Figure S15. <sup>1</sup>H NMR spectrum of compound **4c**.

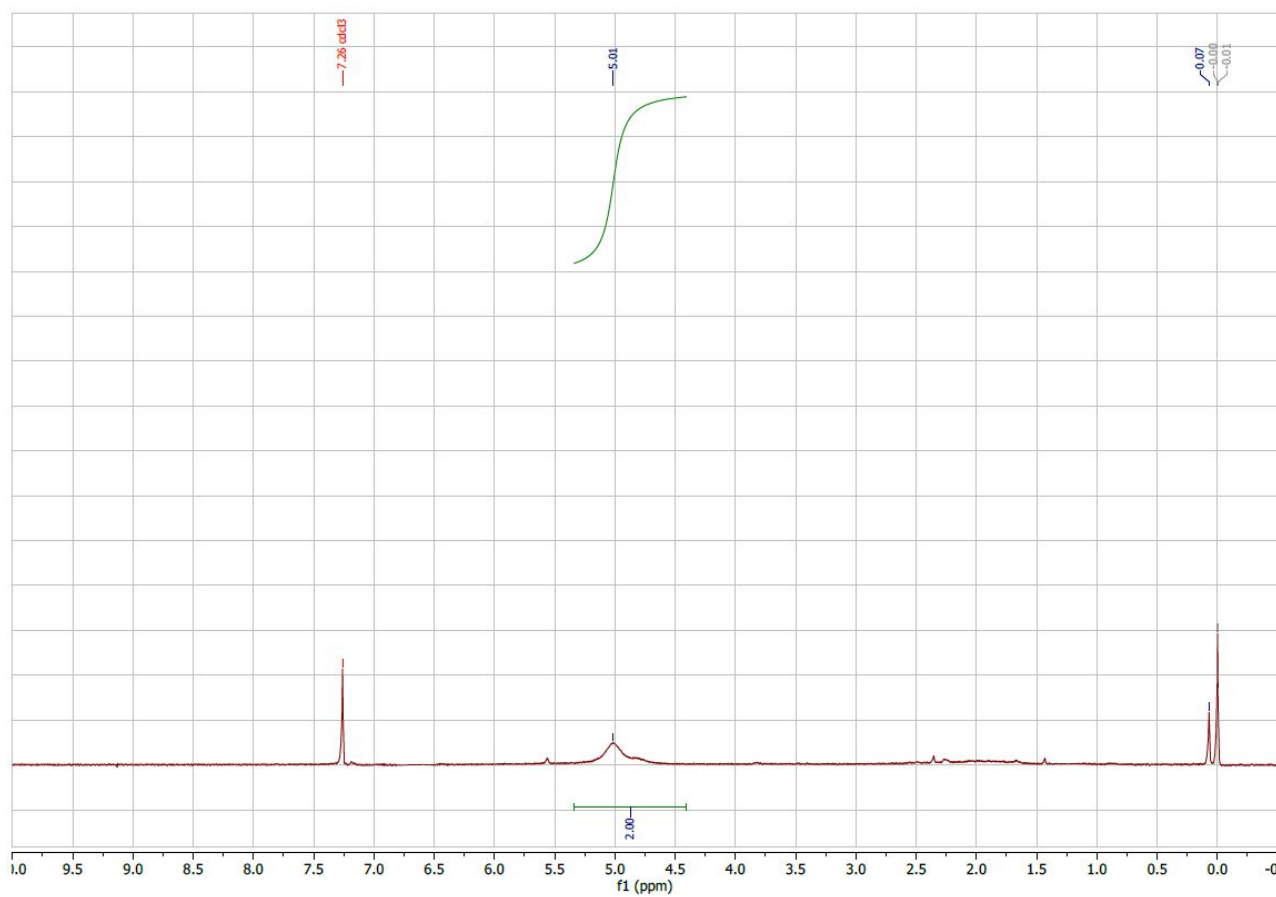

Figure S16. <sup>1</sup>H NMR spectrum of compound **4d**.

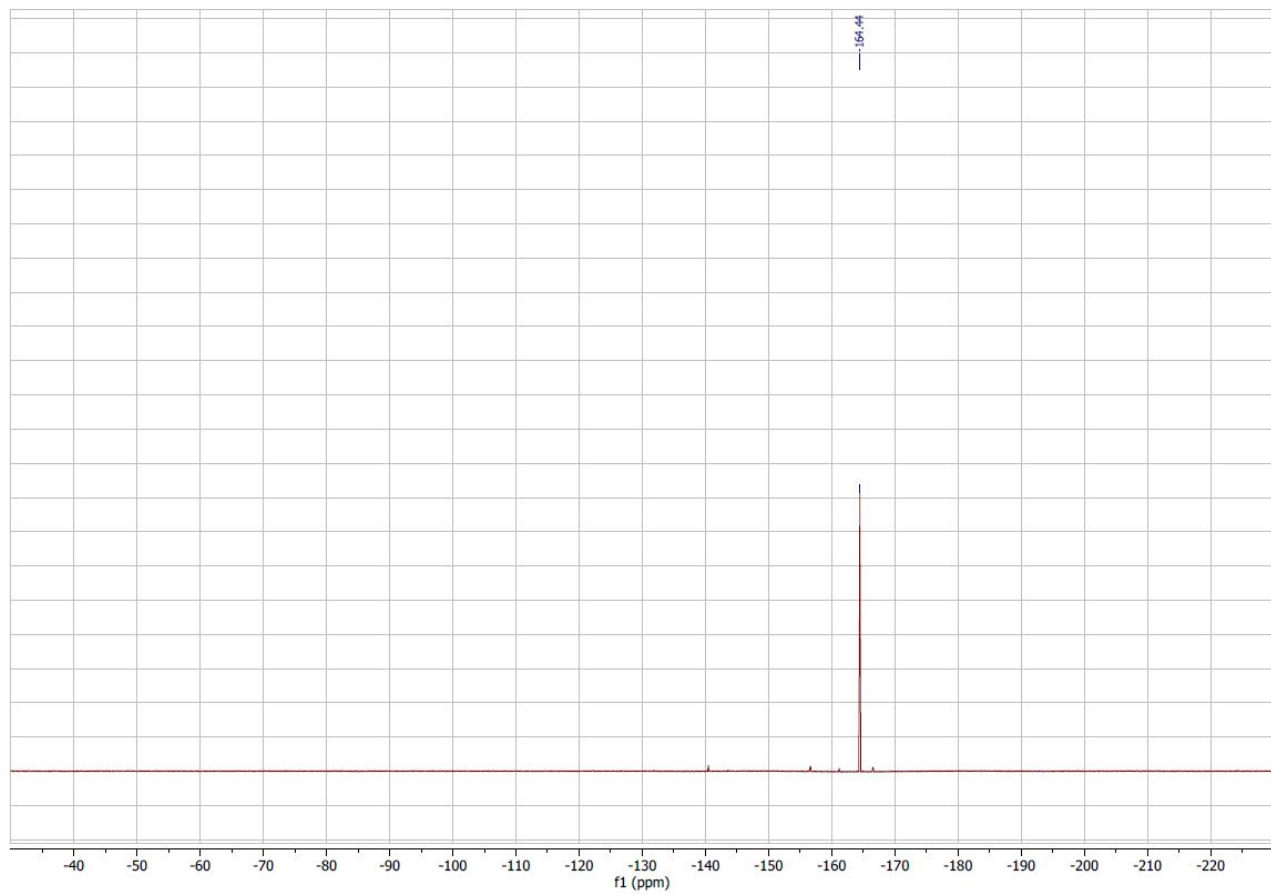

Figure S17. <sup>19</sup>F NMR spectrum of compound **4d**.

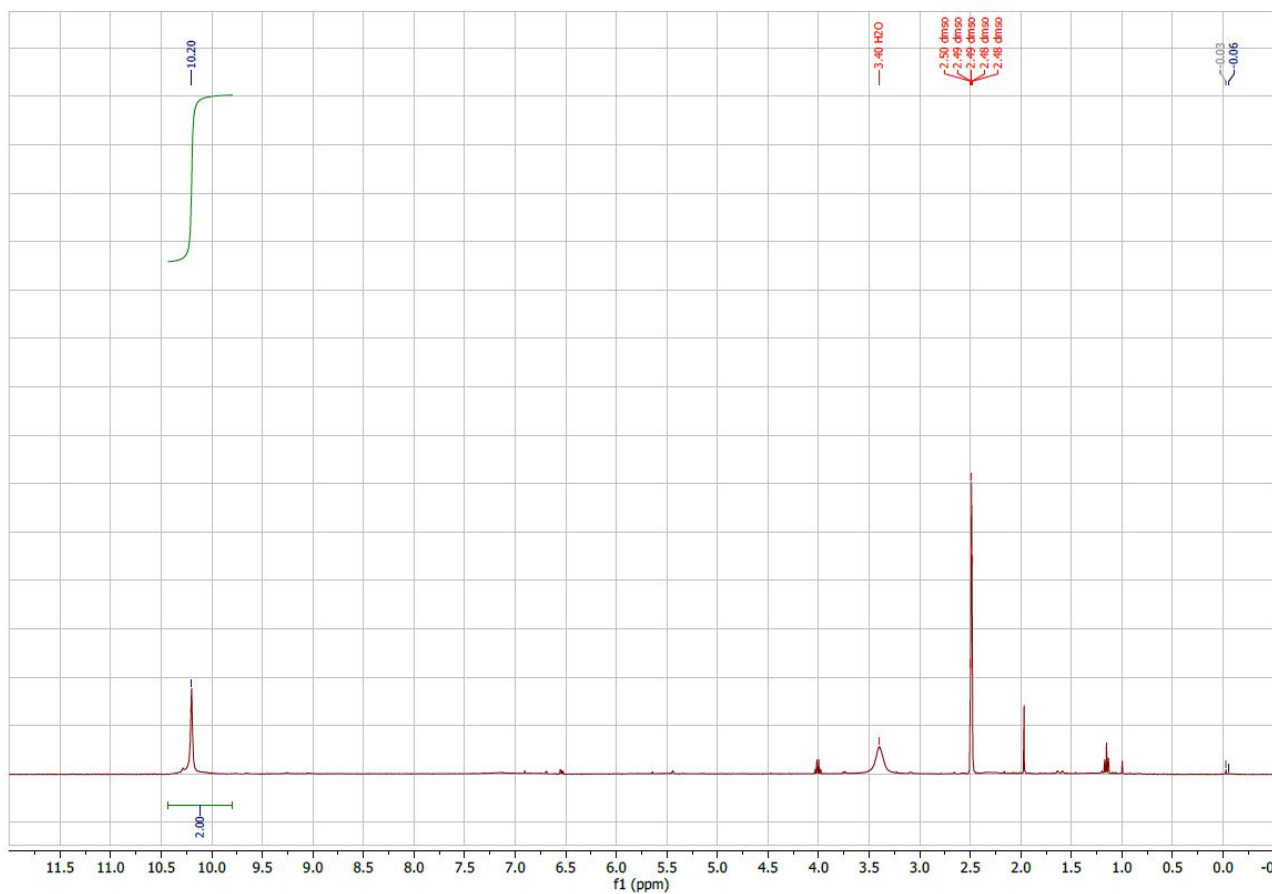

Figure S18. <sup>1</sup>H NMR spectrum of compound **4e**.

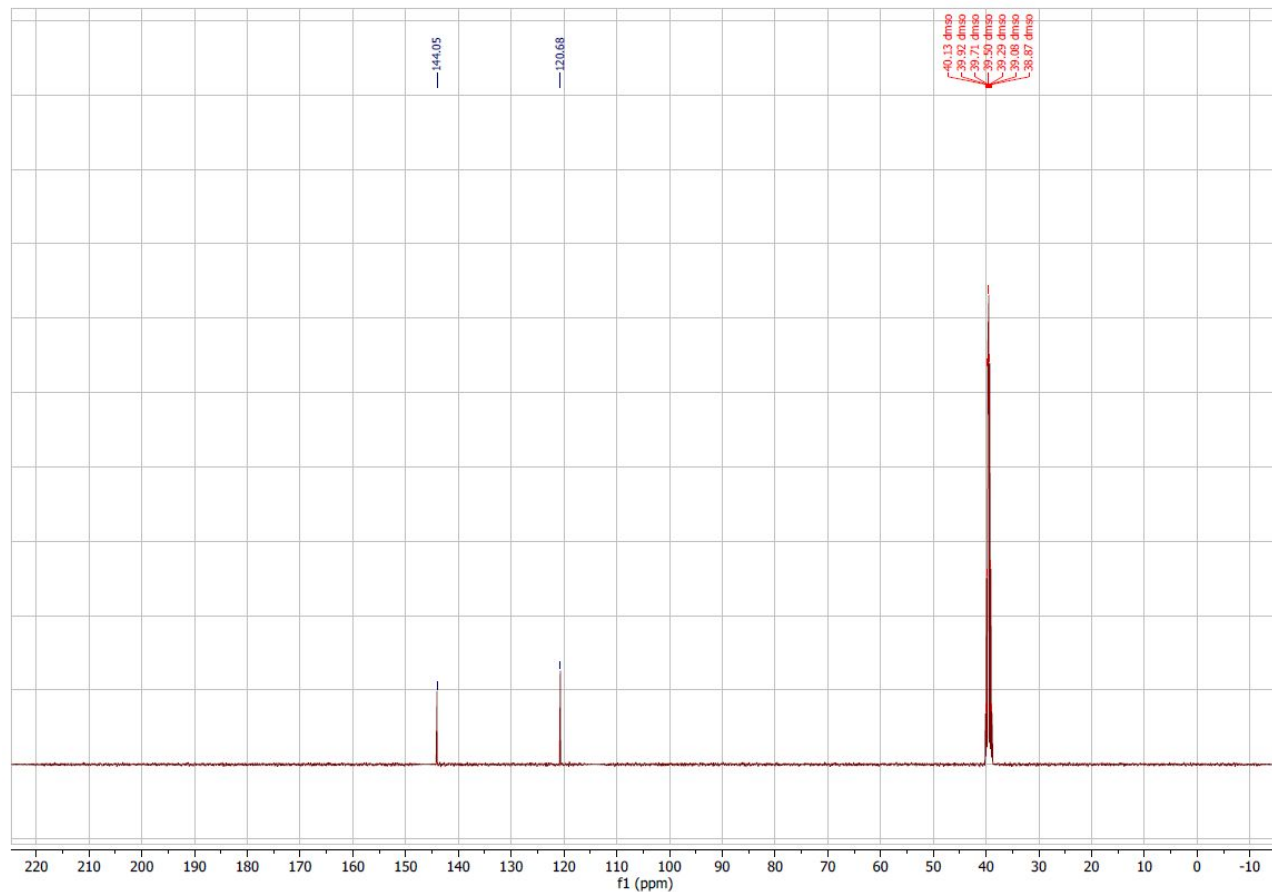

Figure S19. <sup>13</sup>C {<sup>1</sup>H} NMR spectrum of compound **4e**.

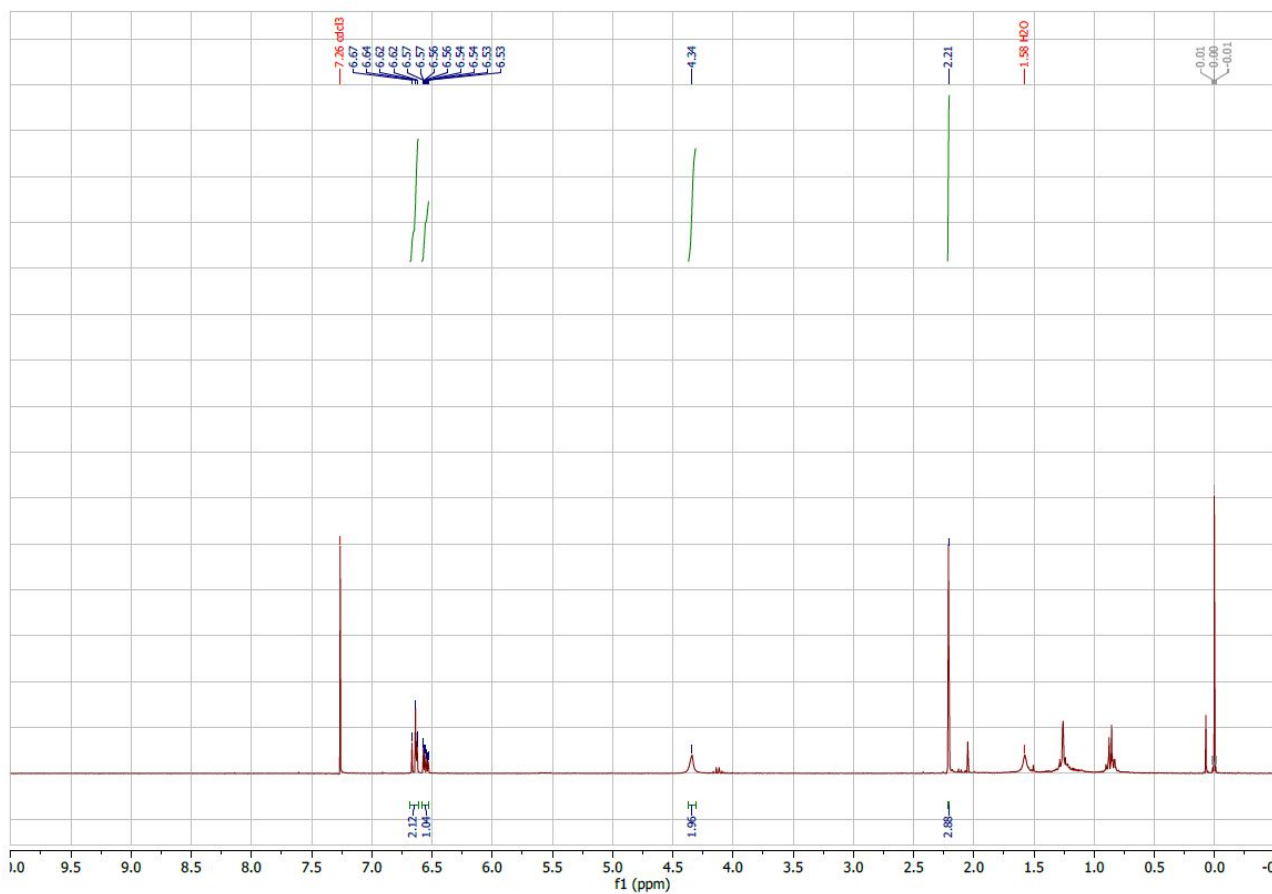

Figure S20.  $^1\text{H}$  NMR spectrum of compound **4f**.

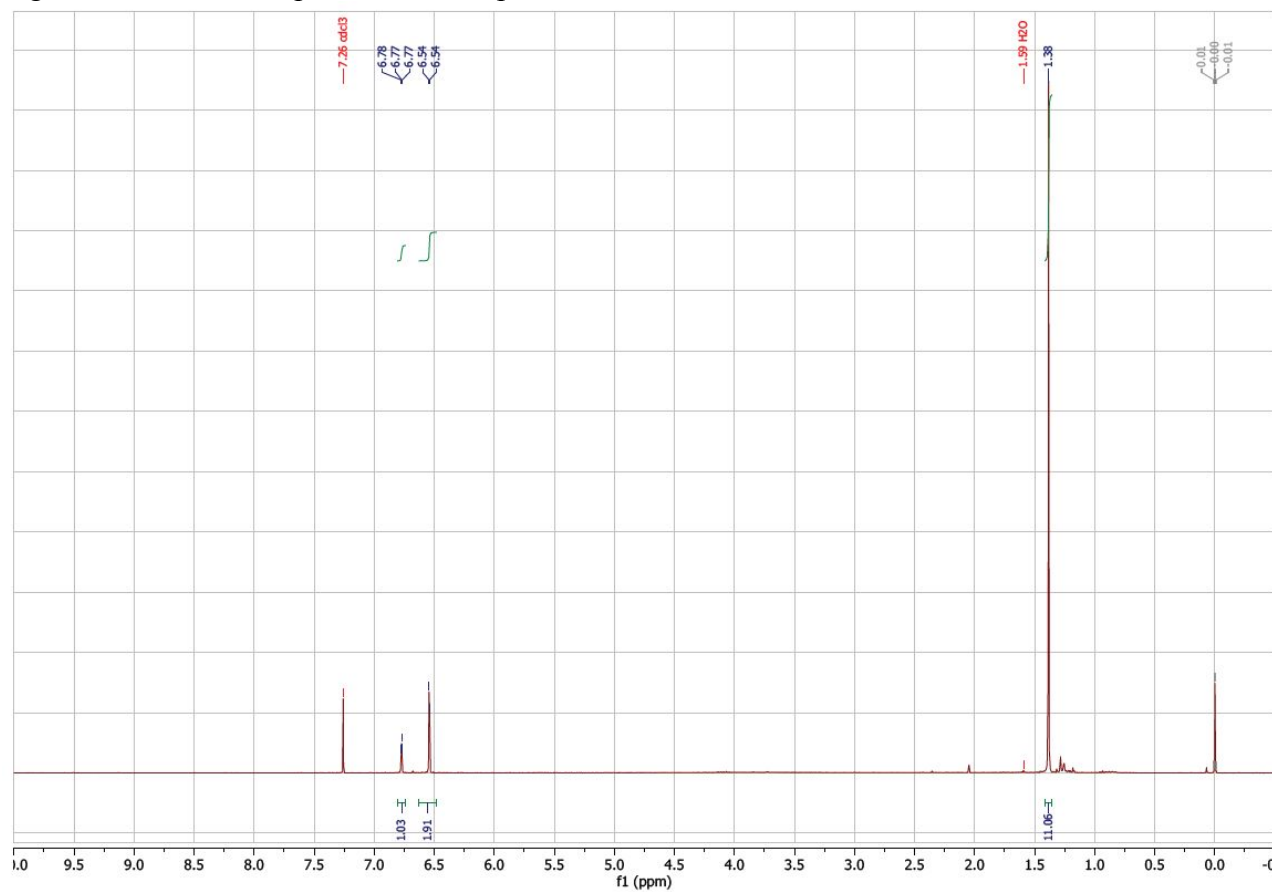

Figure S21.  $^1\text{H}$  NMR spectrum of compound **4g**.



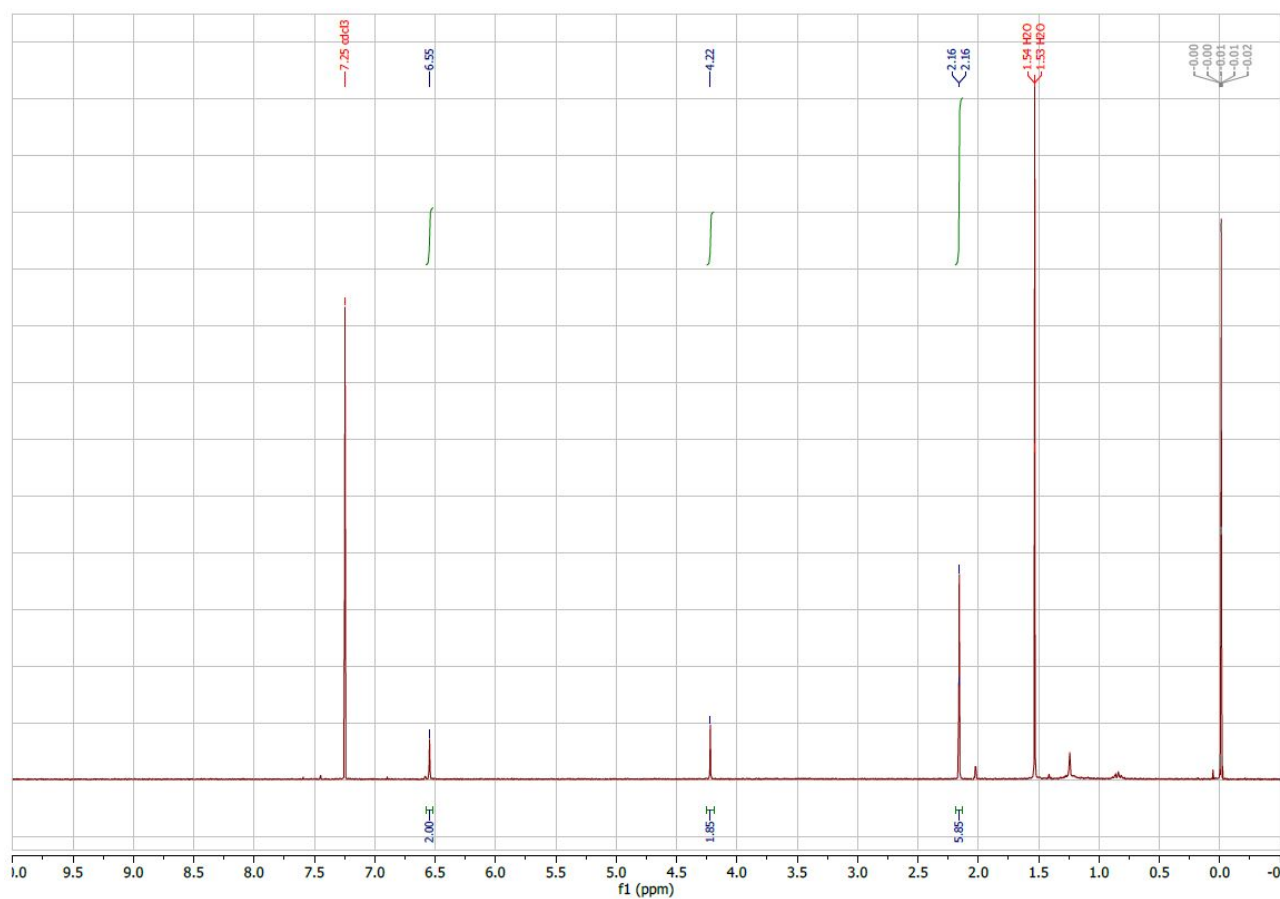

Figure S22. <sup>1</sup>H NMR spectrum of compound **4h**.

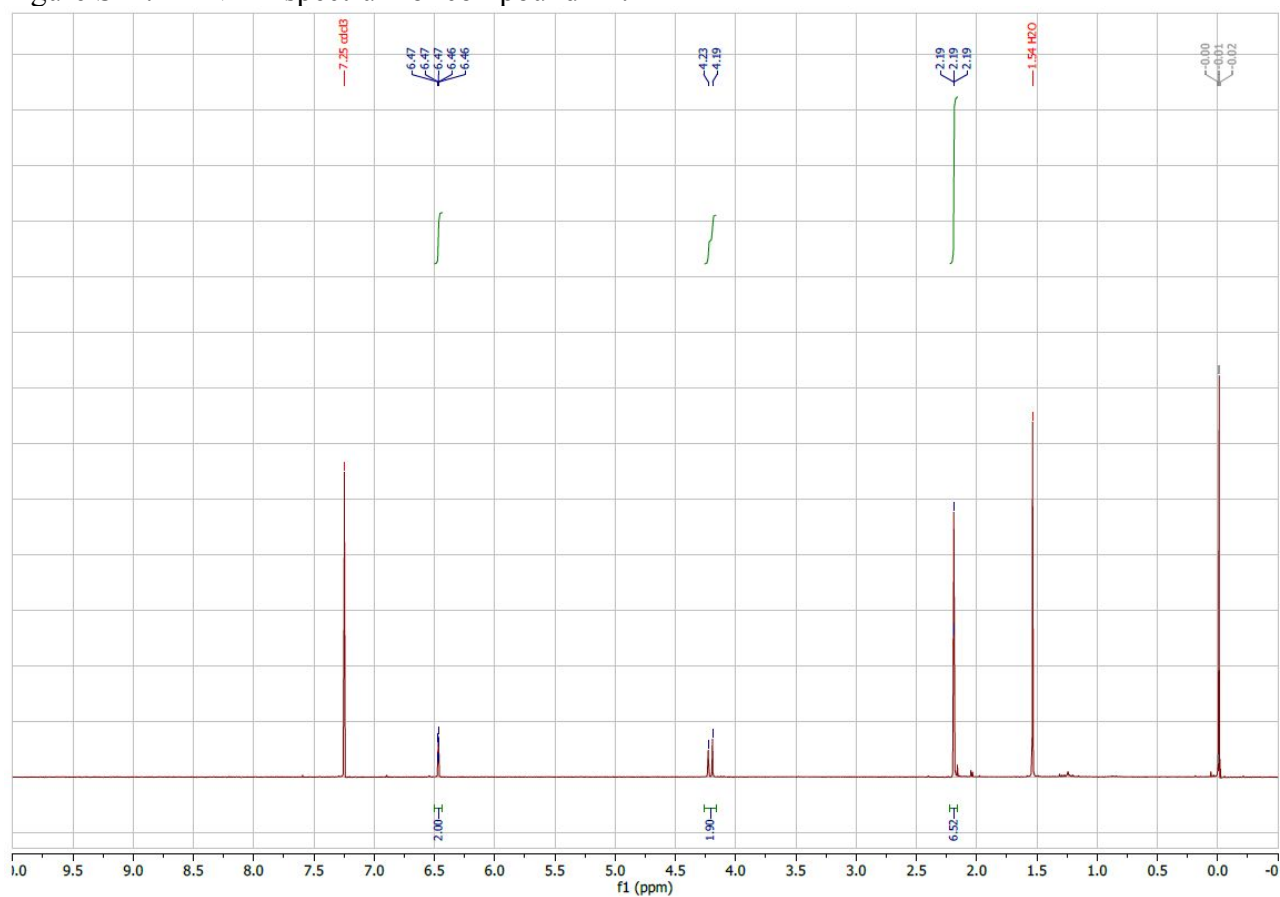

Figure S23. <sup>1</sup>H NMR spectrum of compound **4i**.

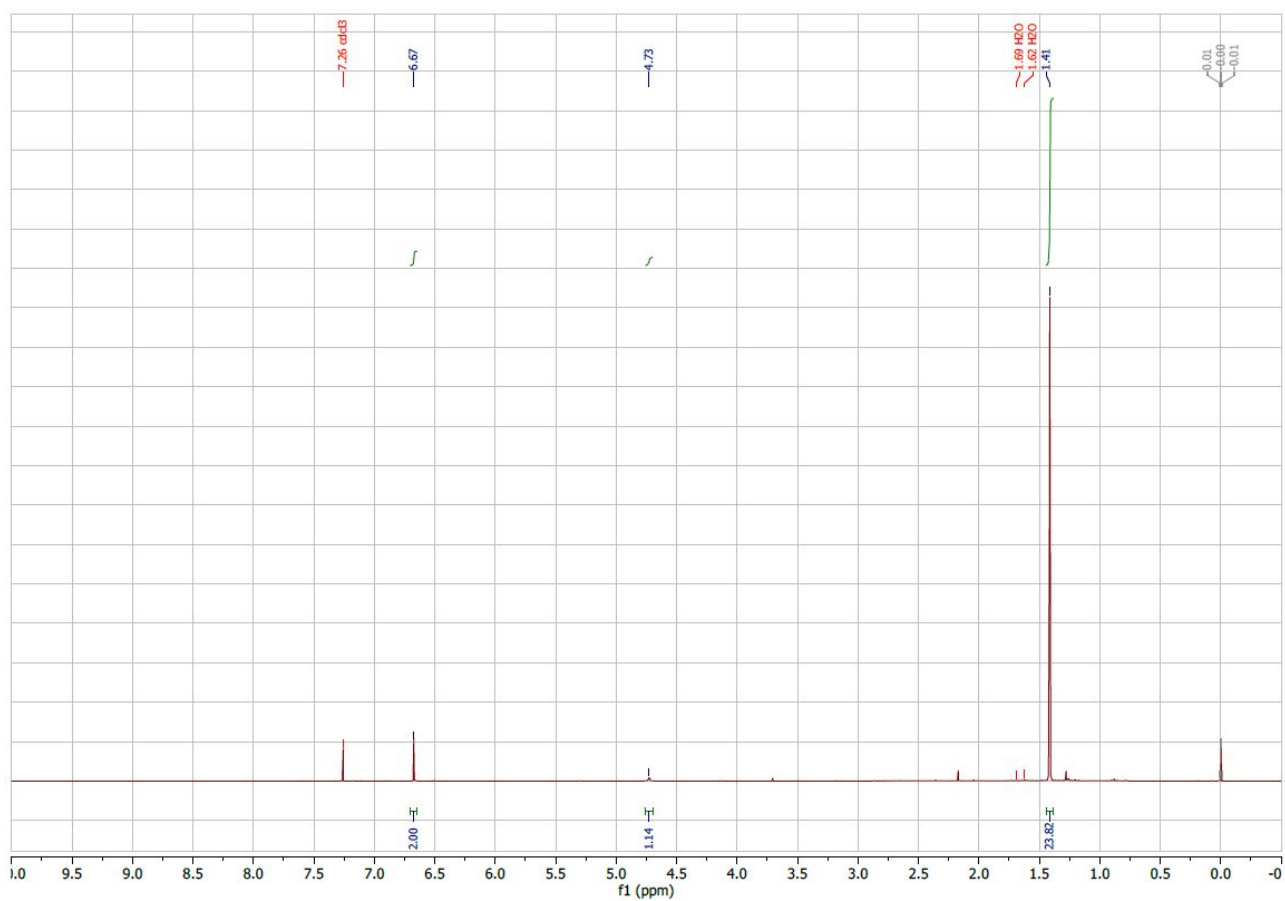

Figure S24. <sup>1</sup>H NMR spectrum of compound **4j**.

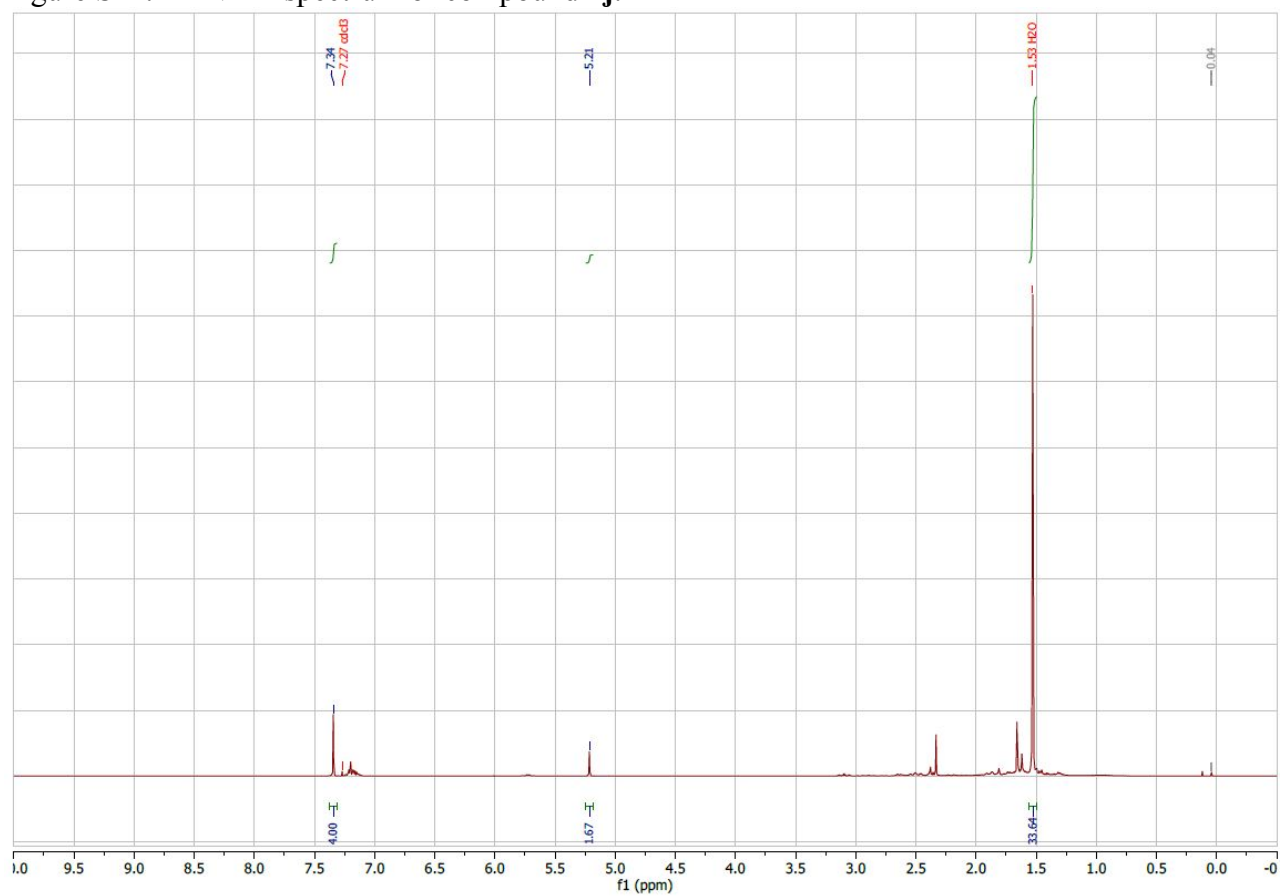

Figure S25. <sup>1</sup>H NMR spectrum of compound **4jj**.

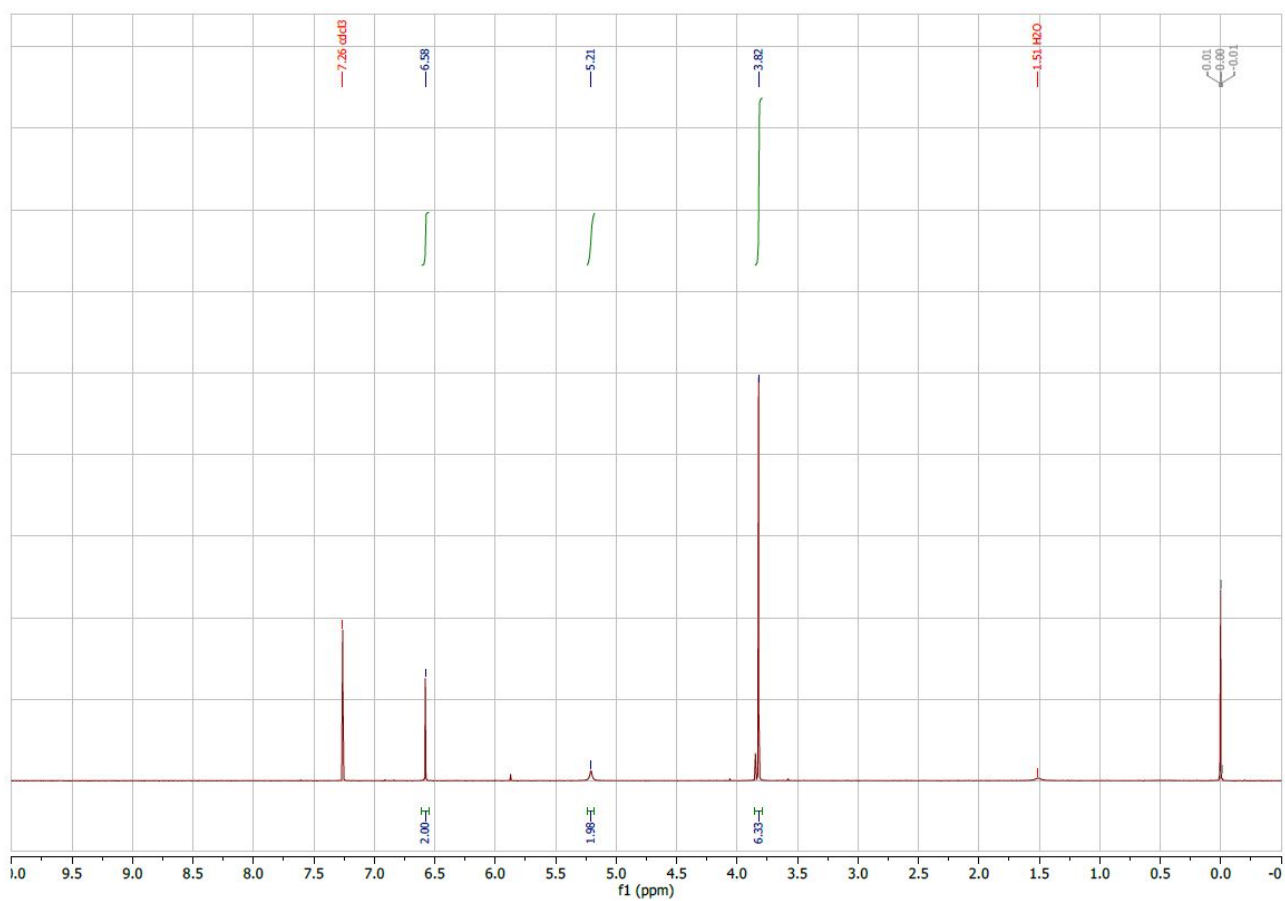

Figure S26. <sup>1</sup>H NMR spectrum of compound **4k**.

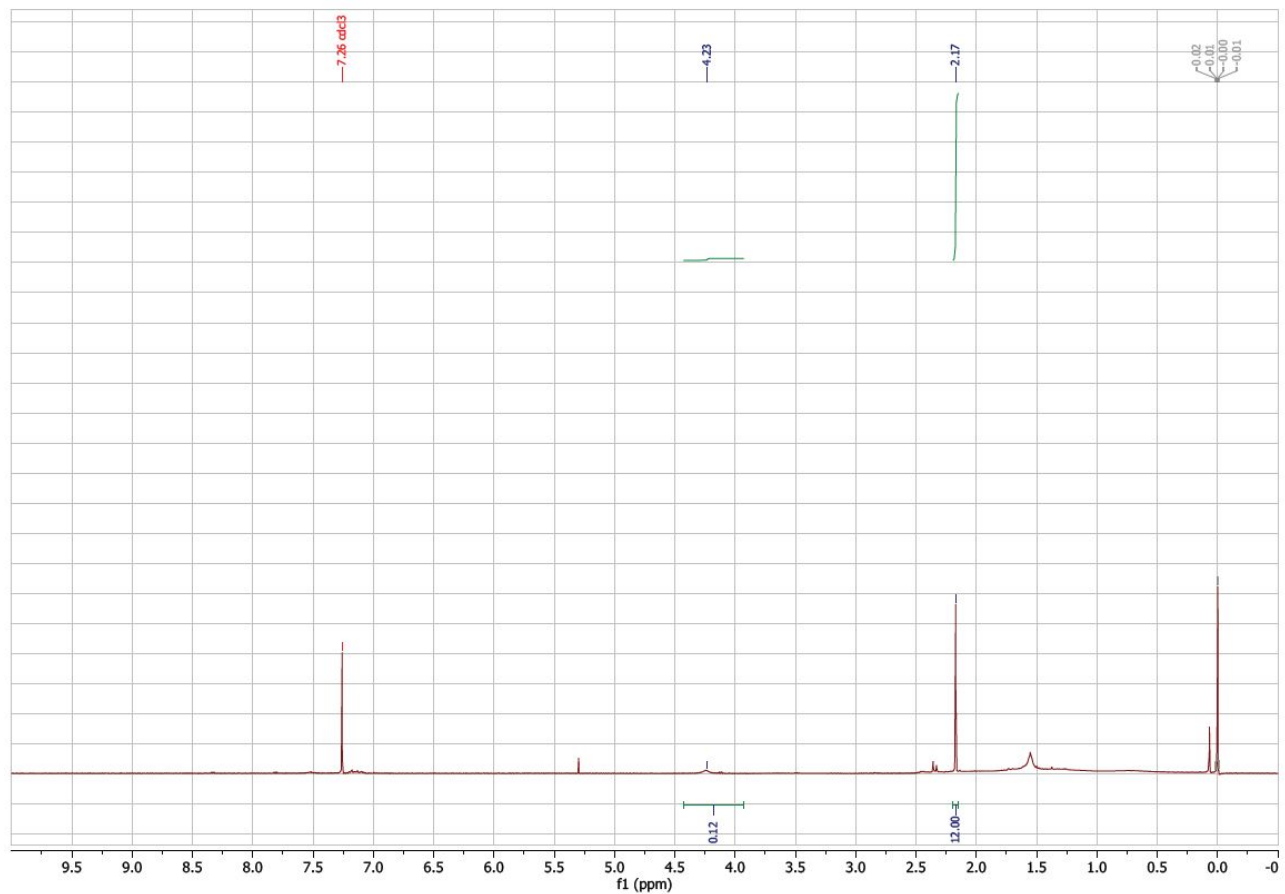

Figure S27. <sup>1</sup>H NMR spectrum of compound **4l**.

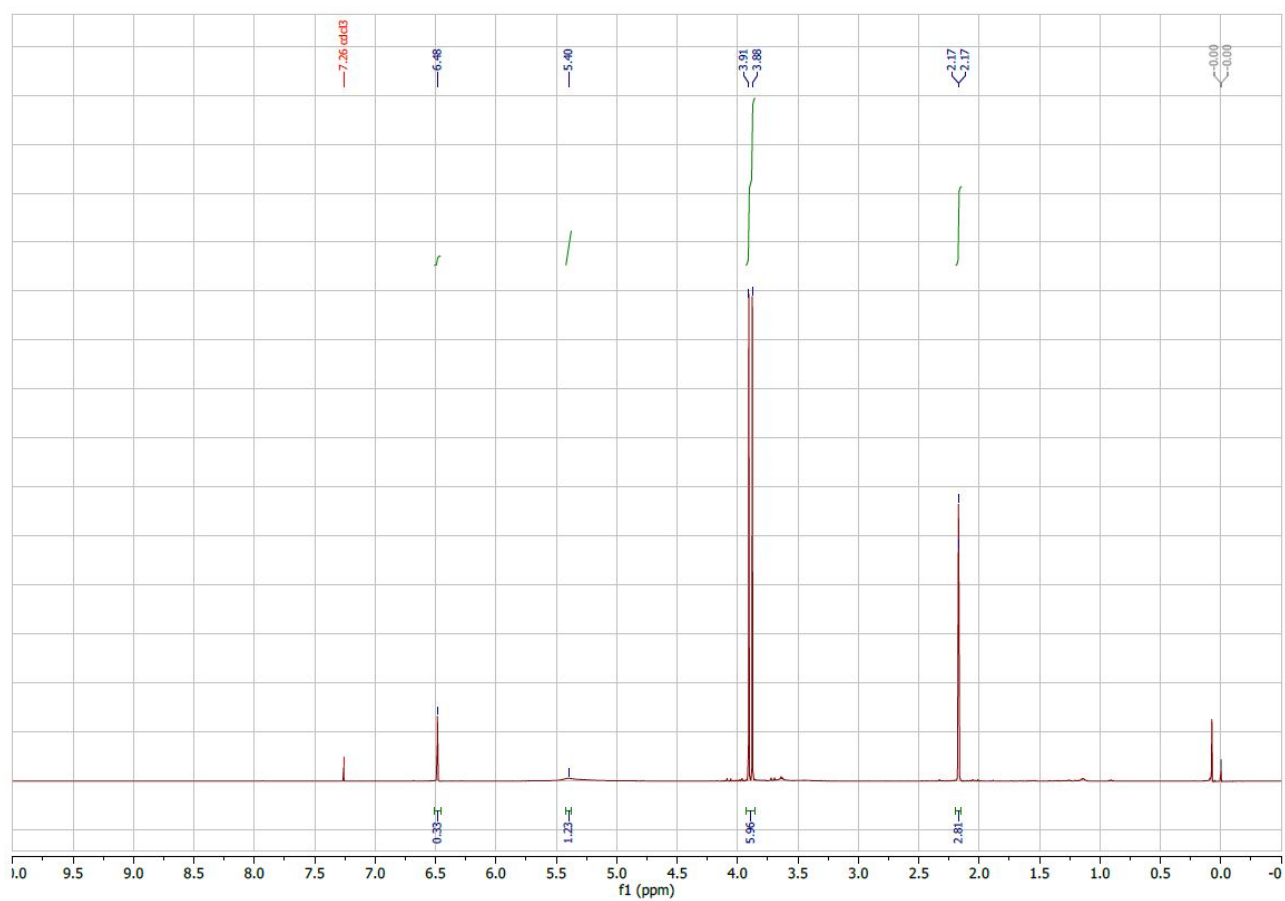

Figure S28.  $^1\text{H}$  NMR spectrum of compound **4CoQ<sub>0</sub>**.
